# Supplementary material for: Synthesis and Biological Evaluation of Novel γ‐Alkylidene Butenolides
Source: Hindawi journal article supplement (doi:10.1155/2013/926723), 2013-01-01
Supplement: f1 [file 926723.f1.pdf]

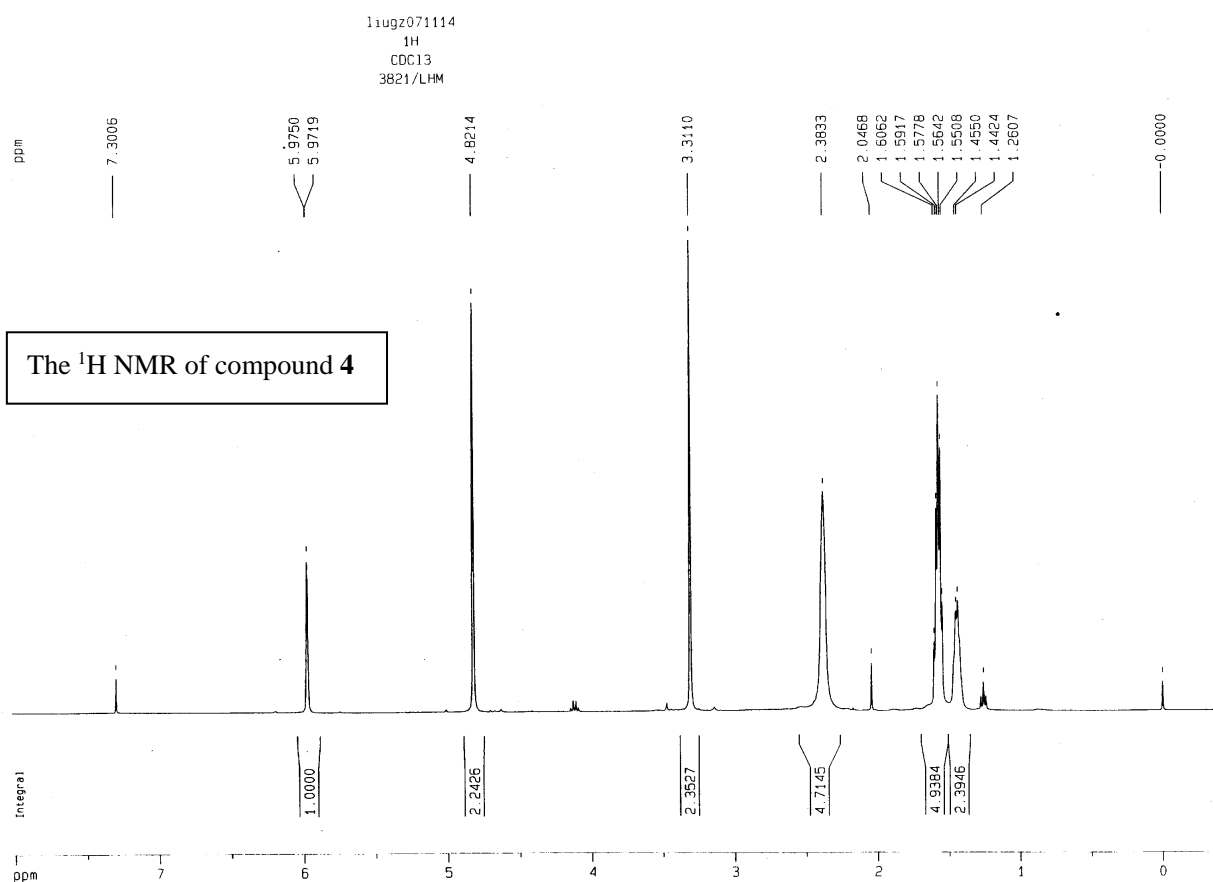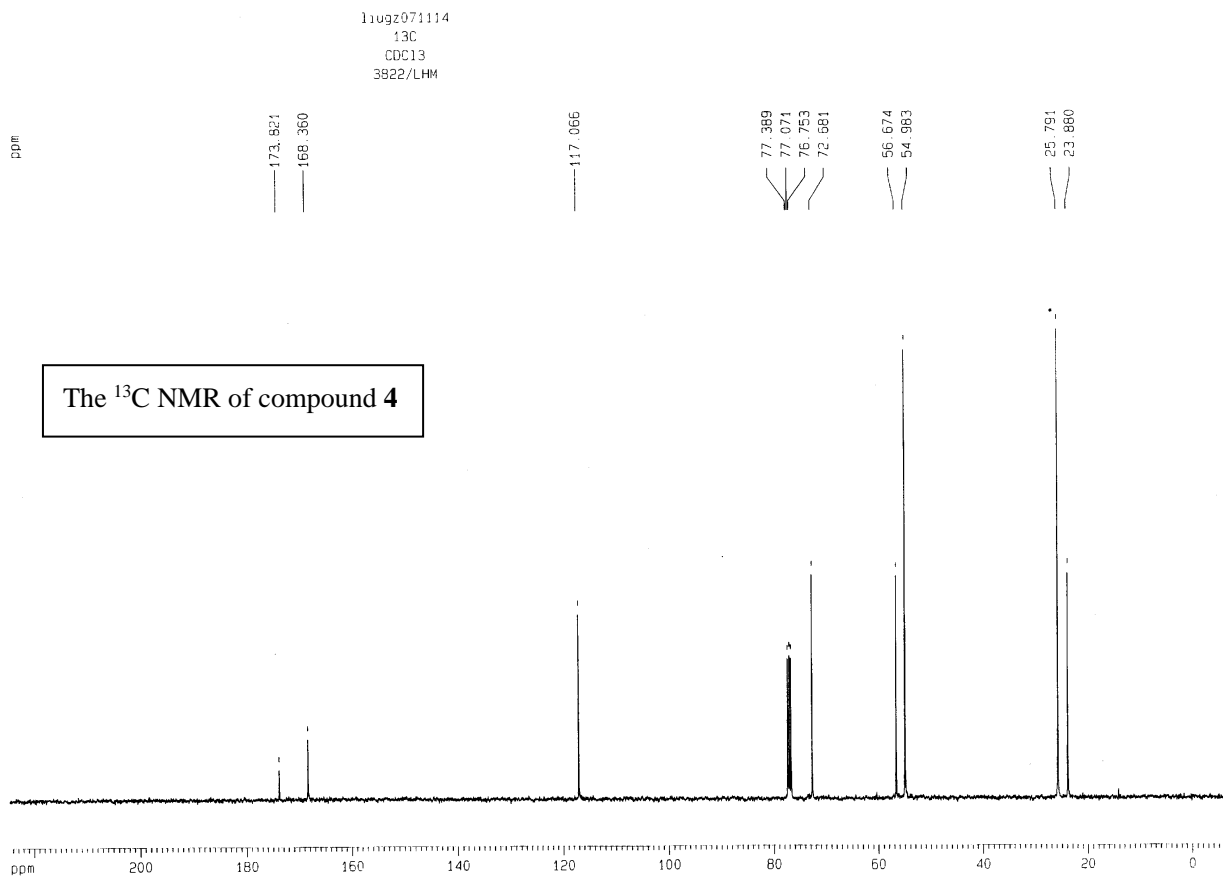

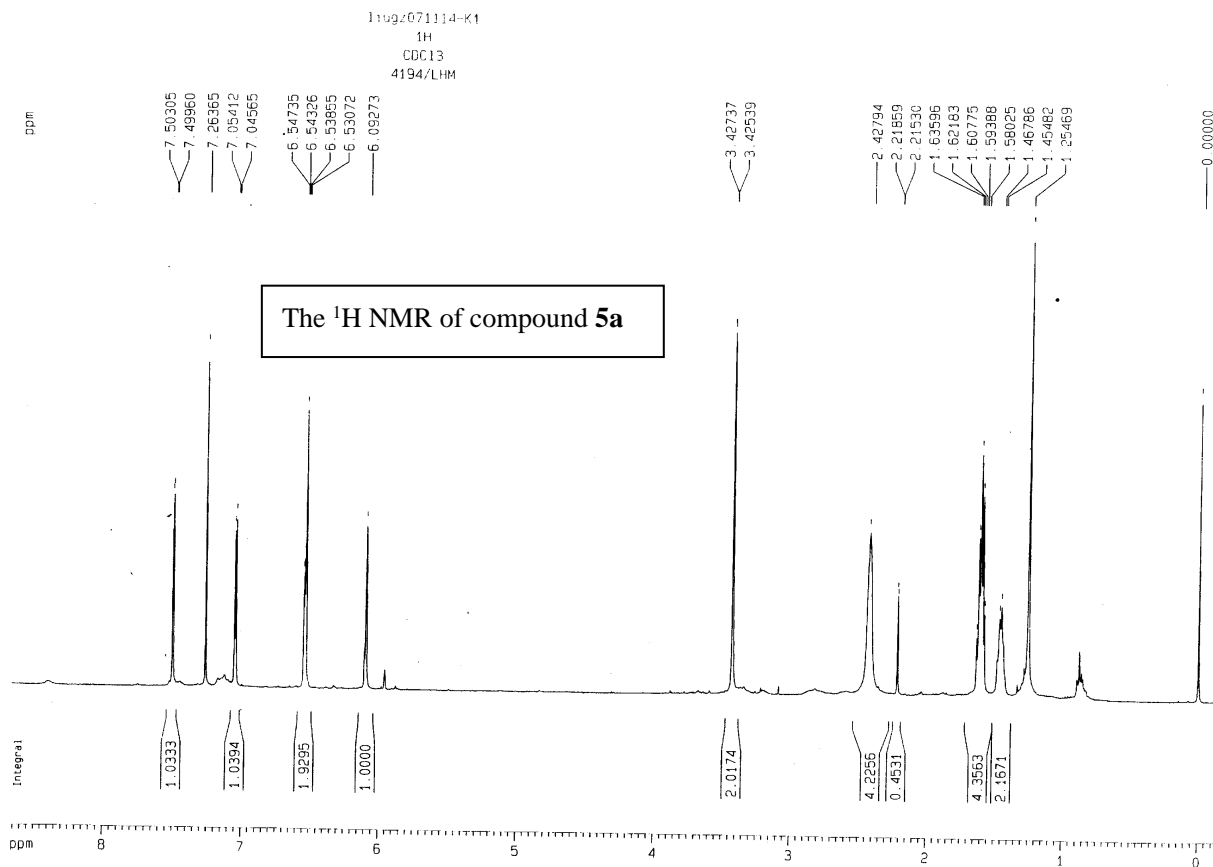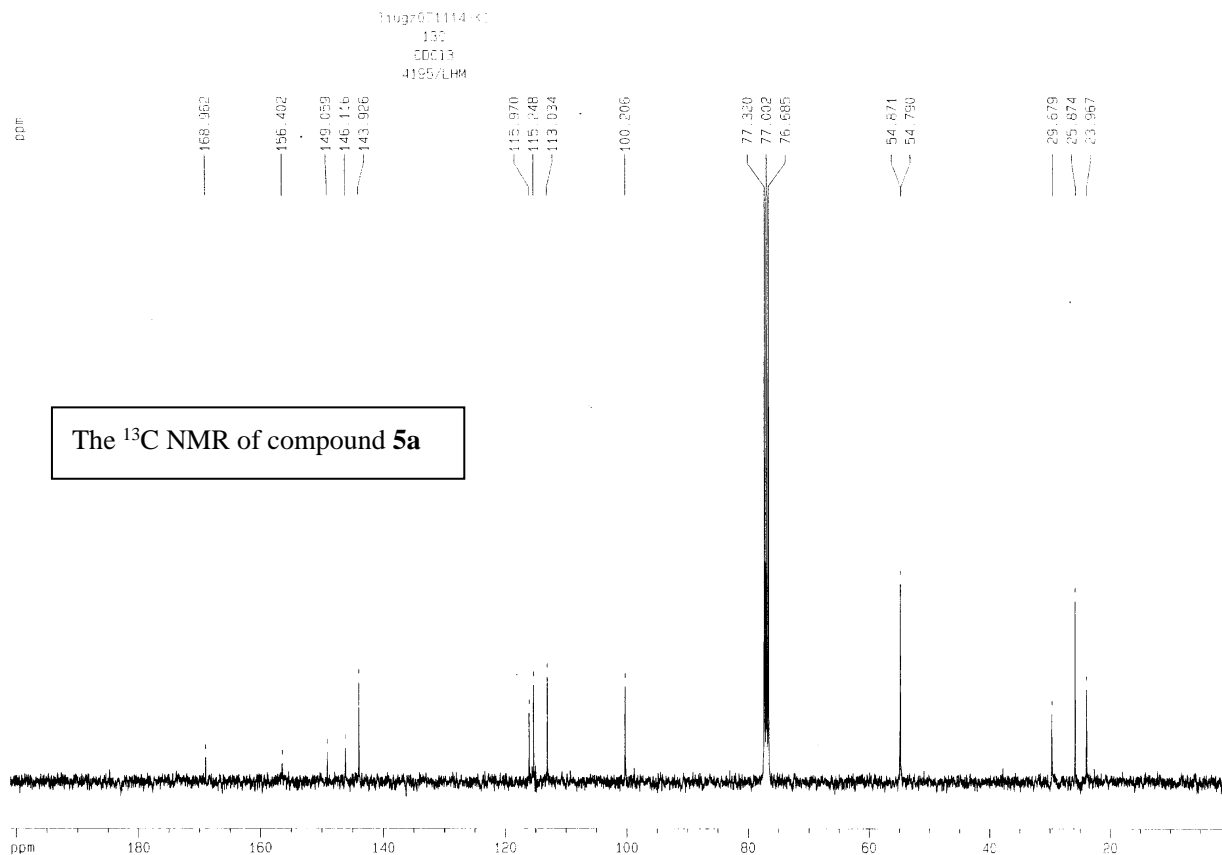

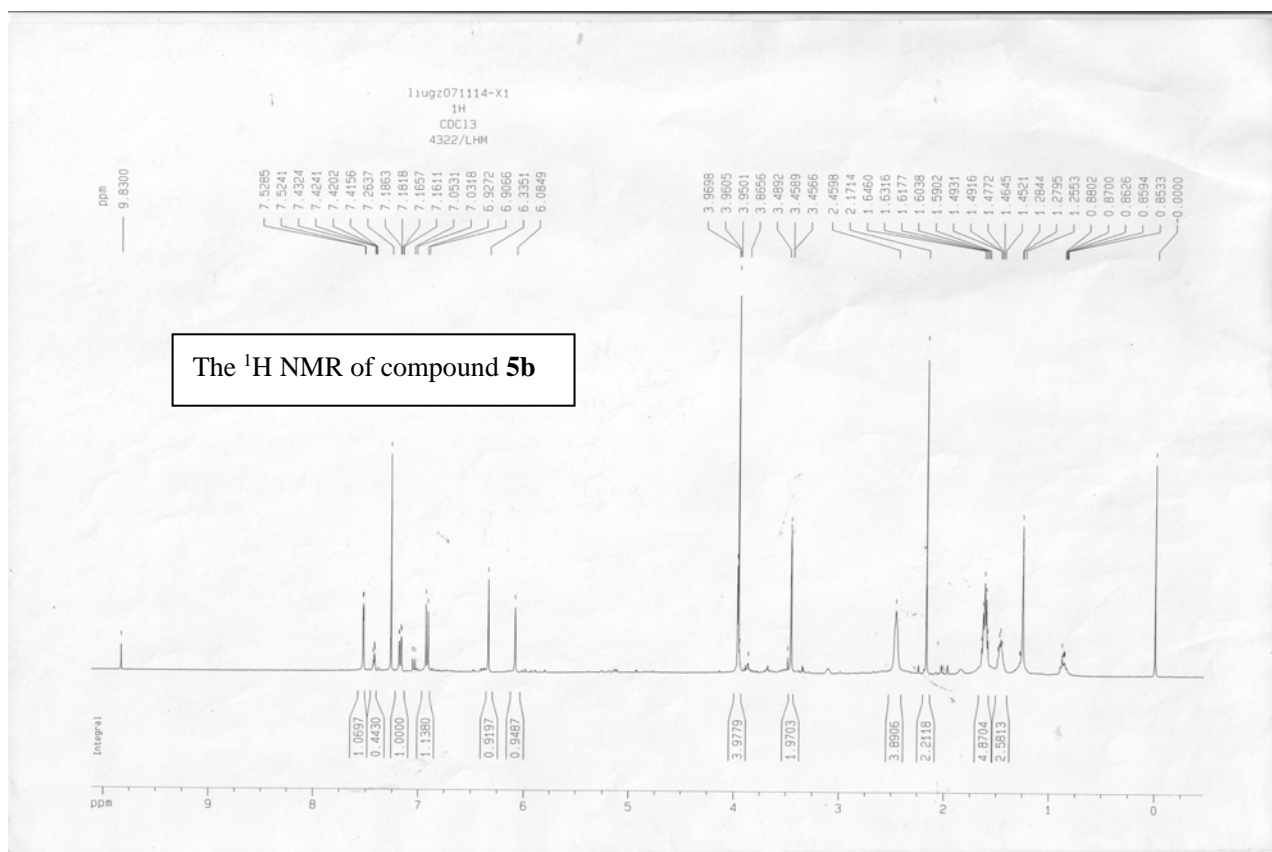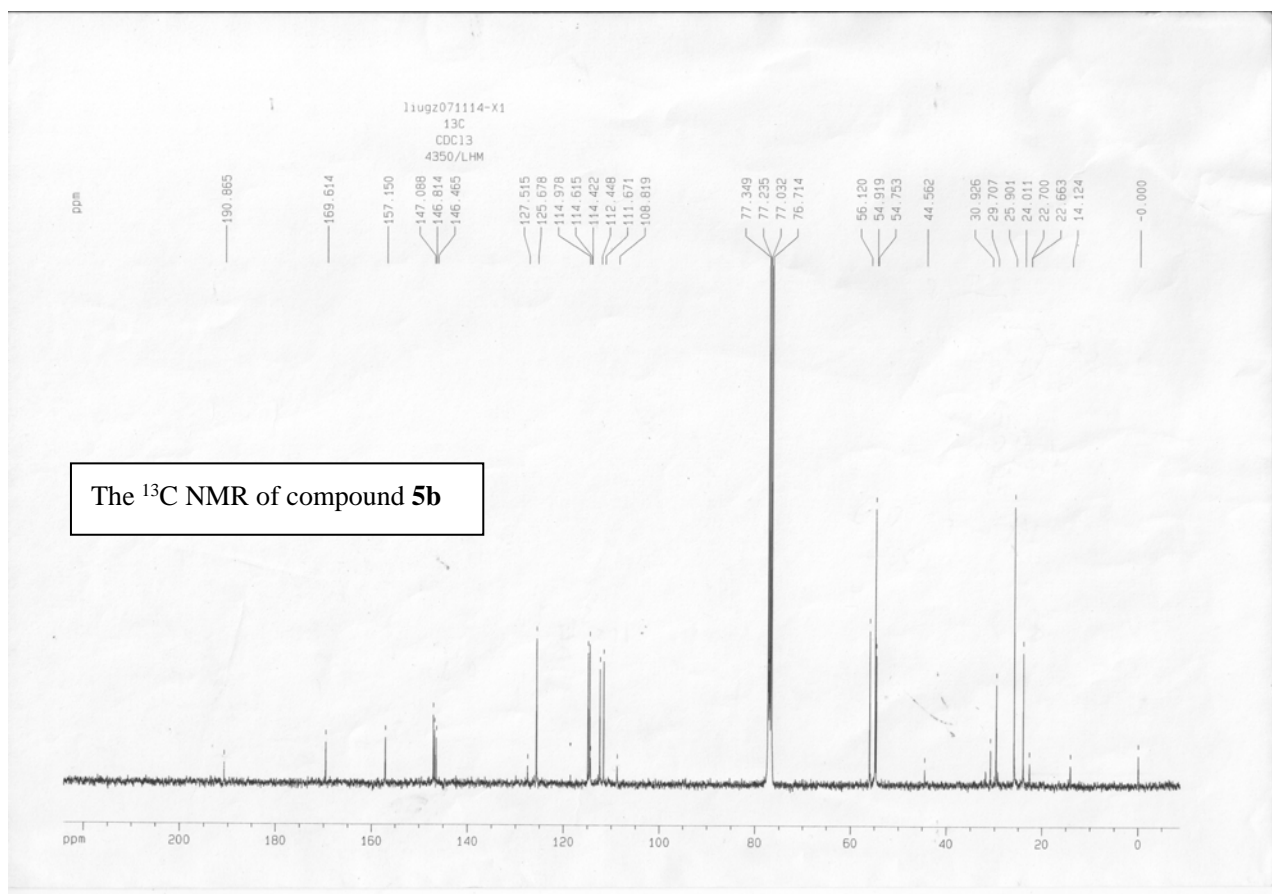

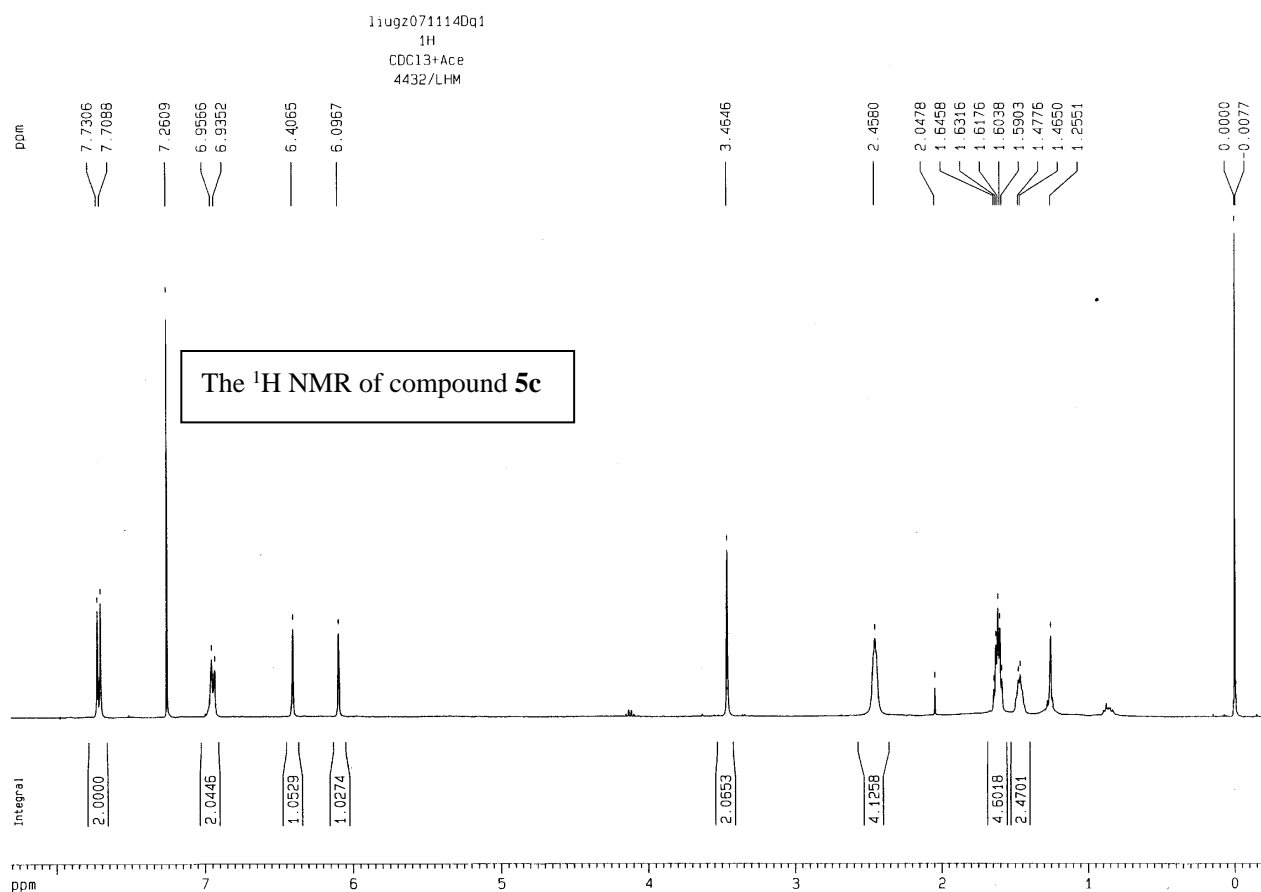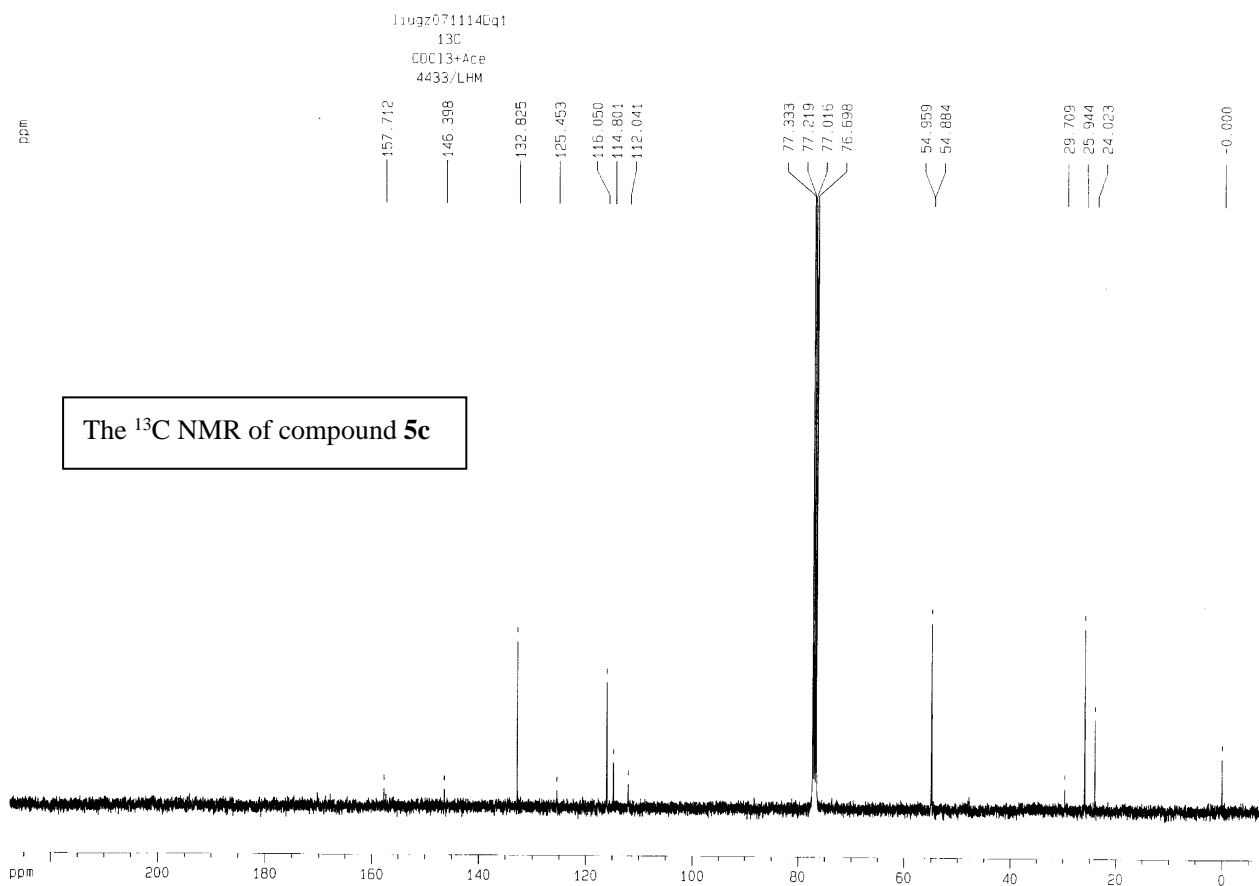

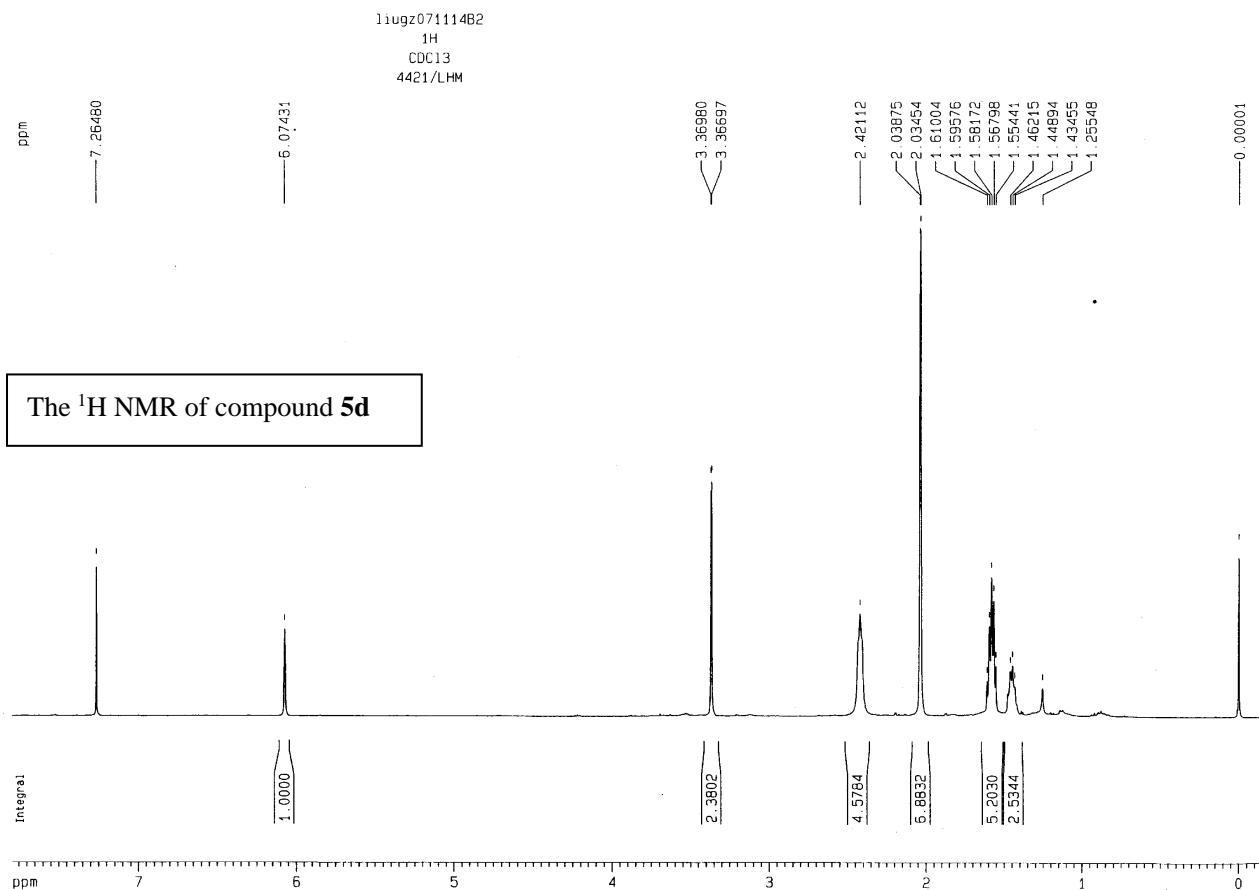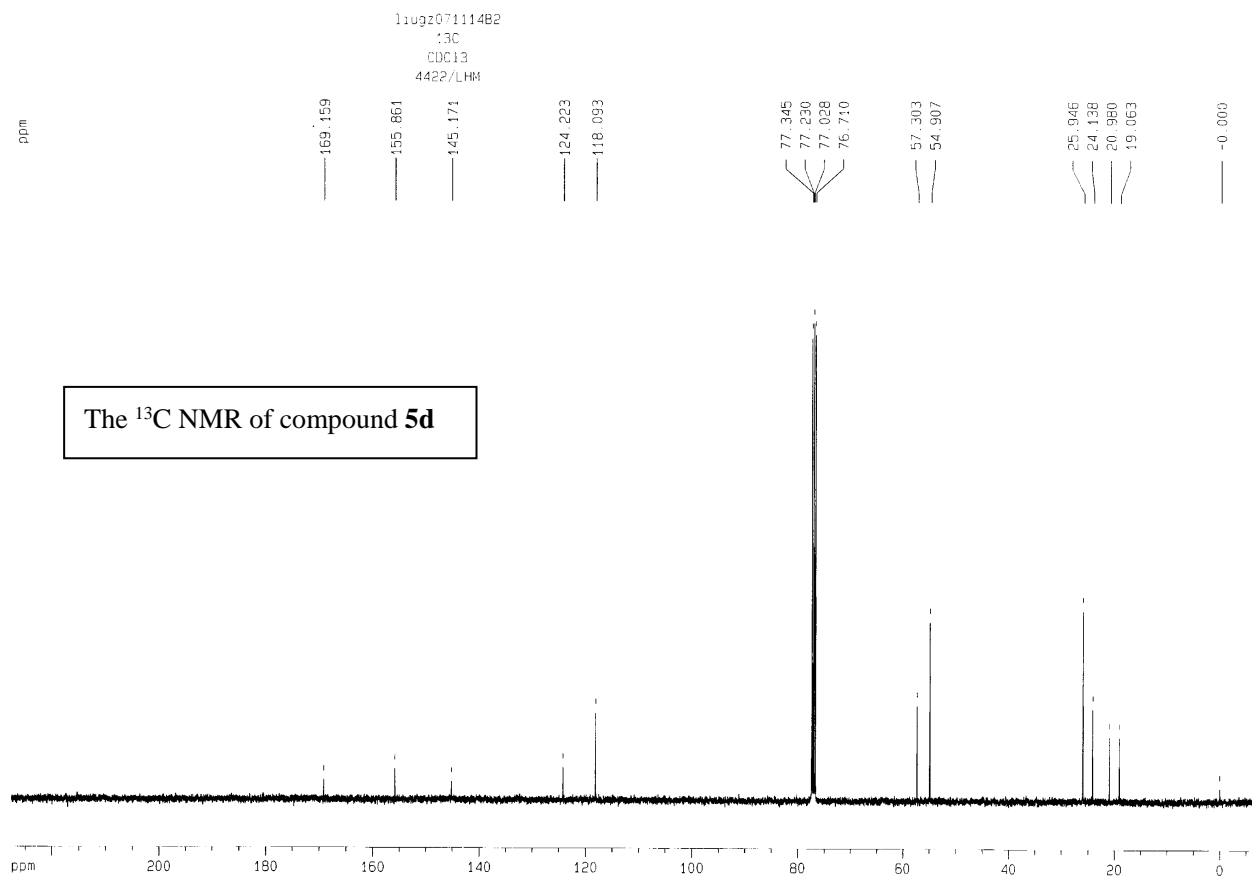

The  $^1\text{H}$  NMR of compound **5e**

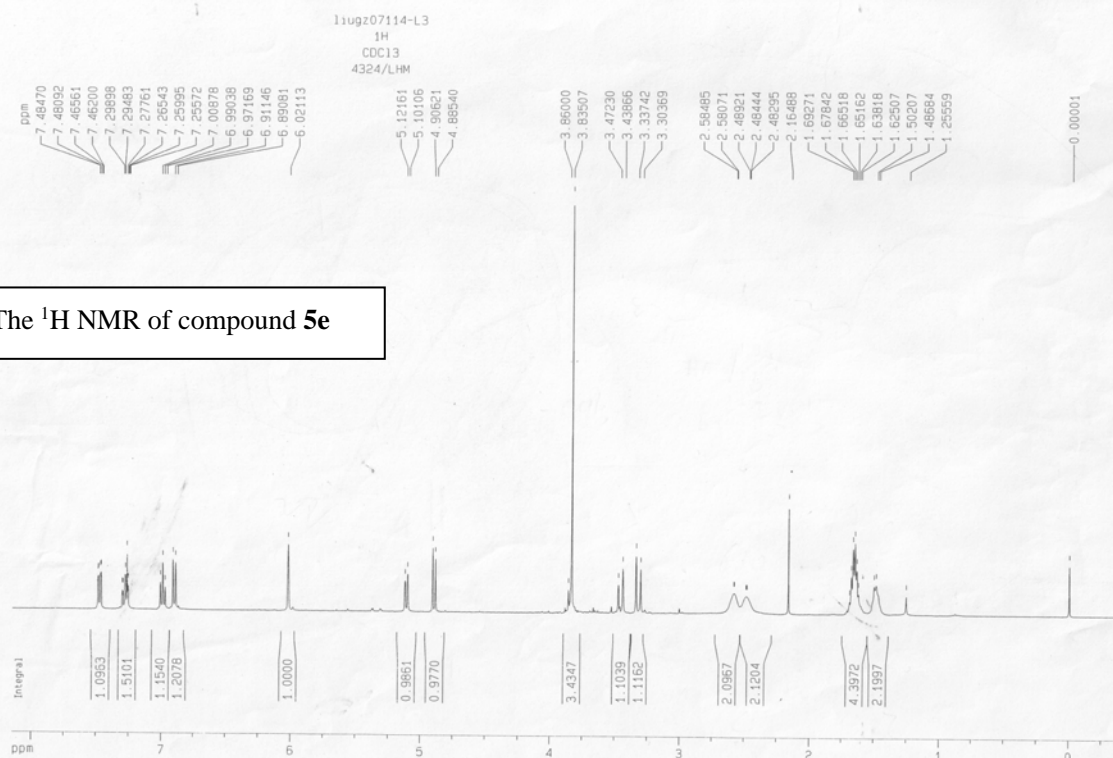

The  $^{13}\text{C}$  NMR of compound **5e**

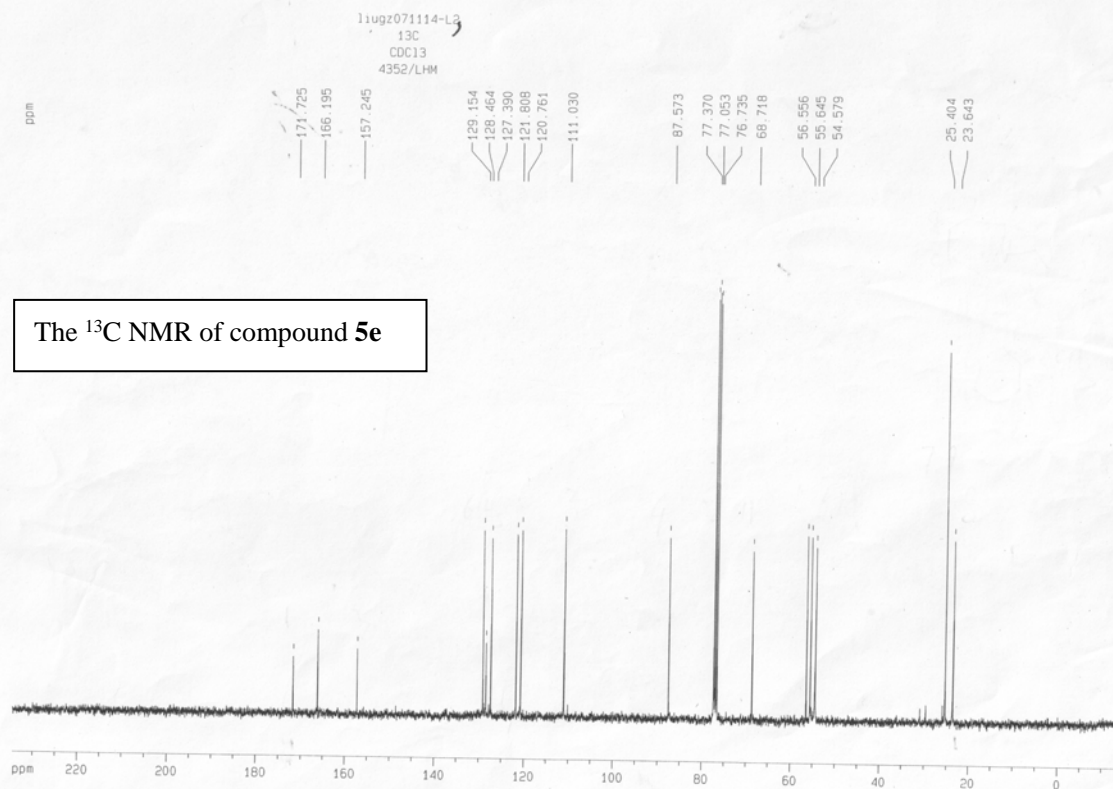

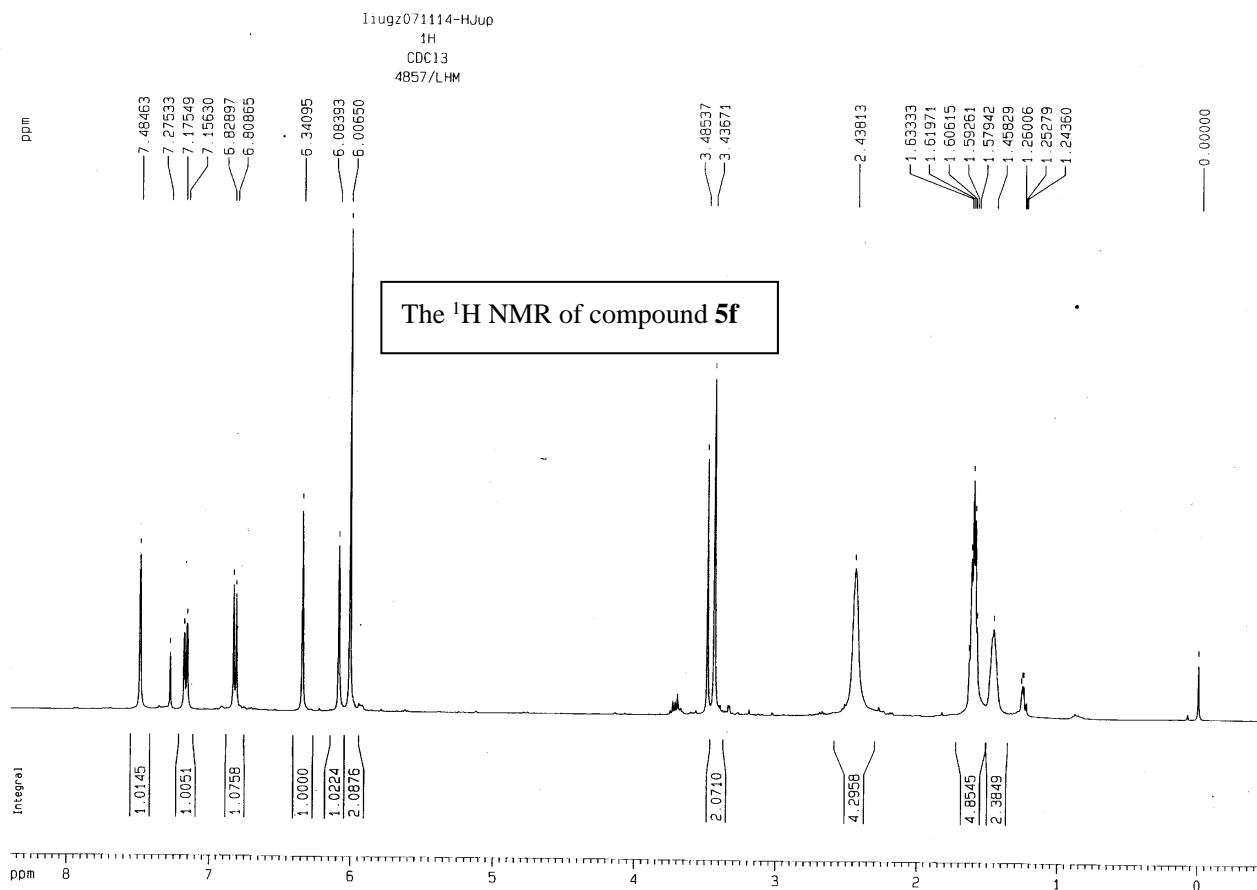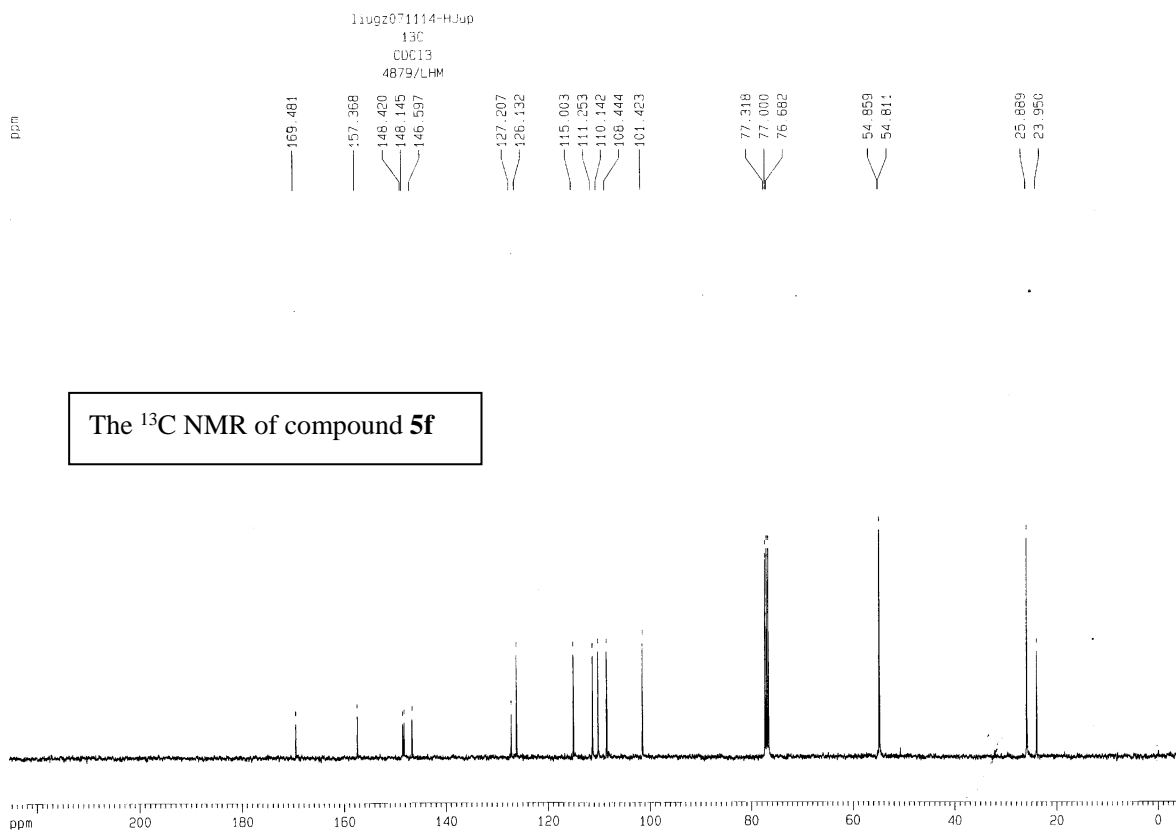

The <sup>13</sup>C NMR of compound **5f**

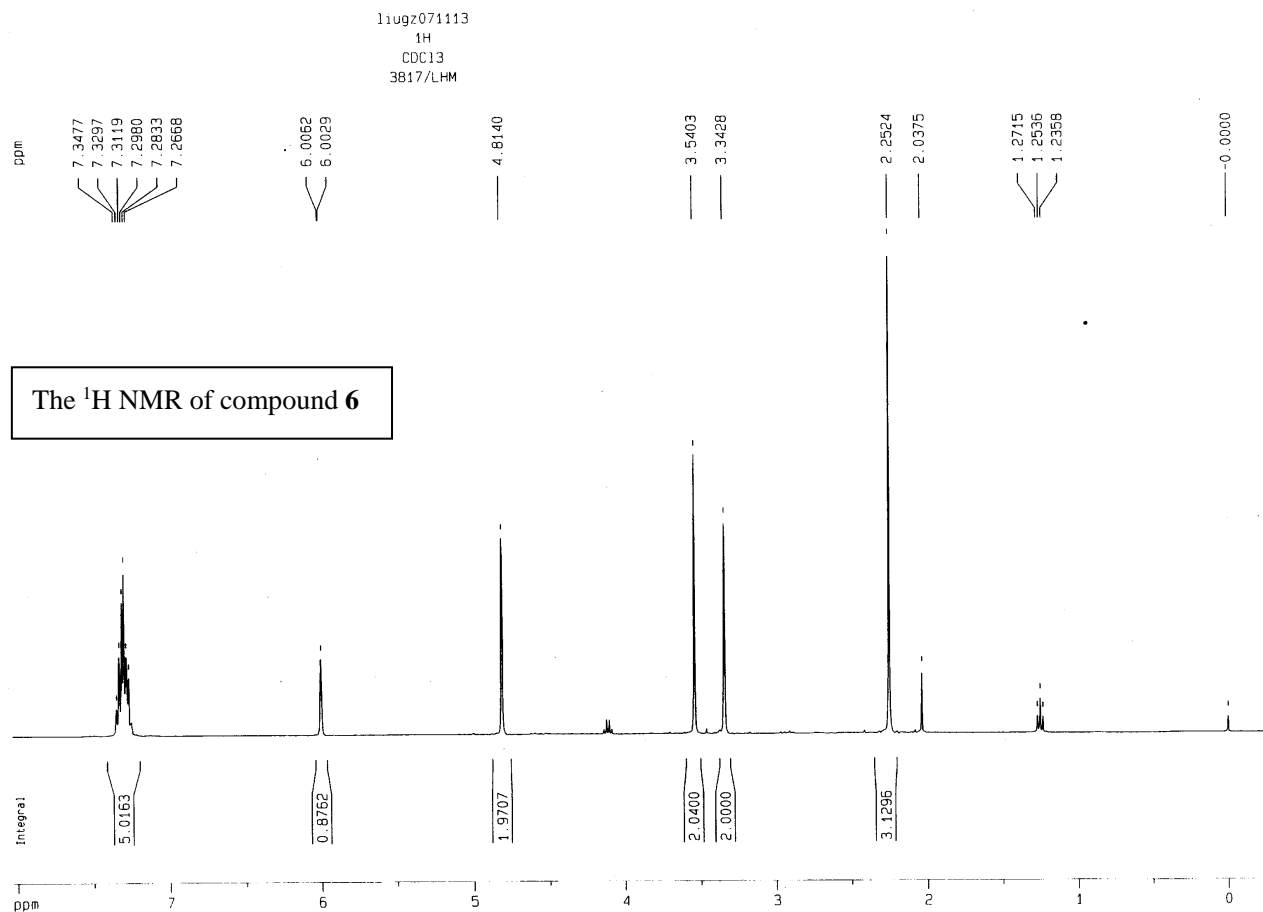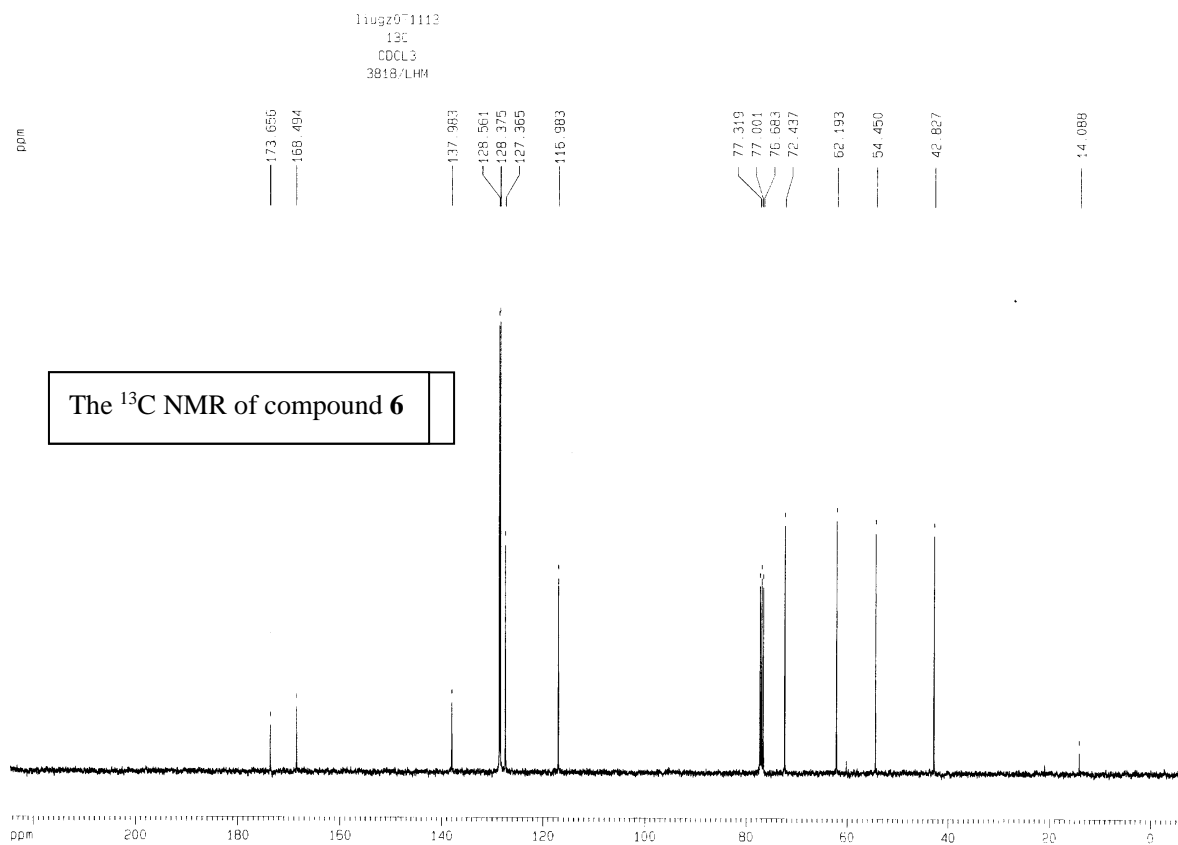



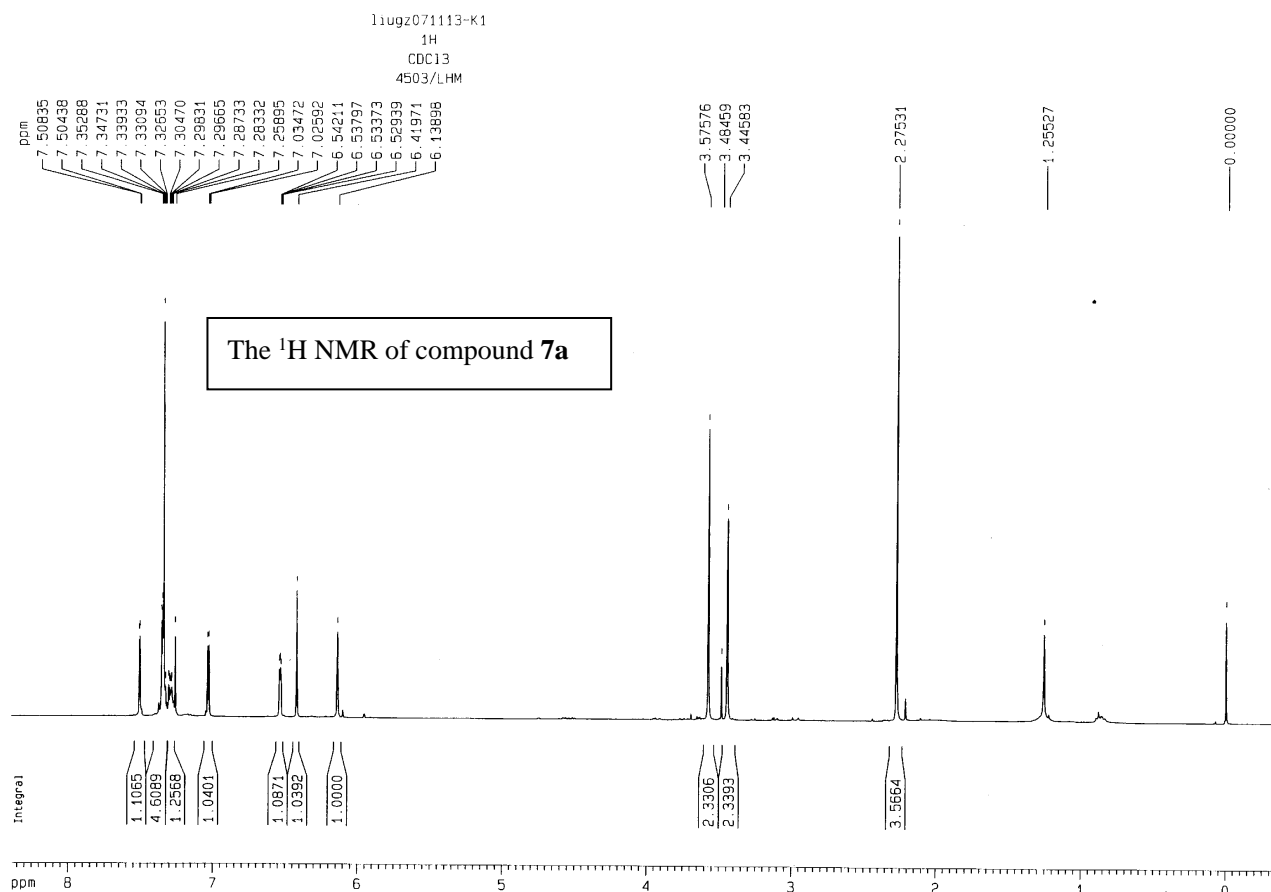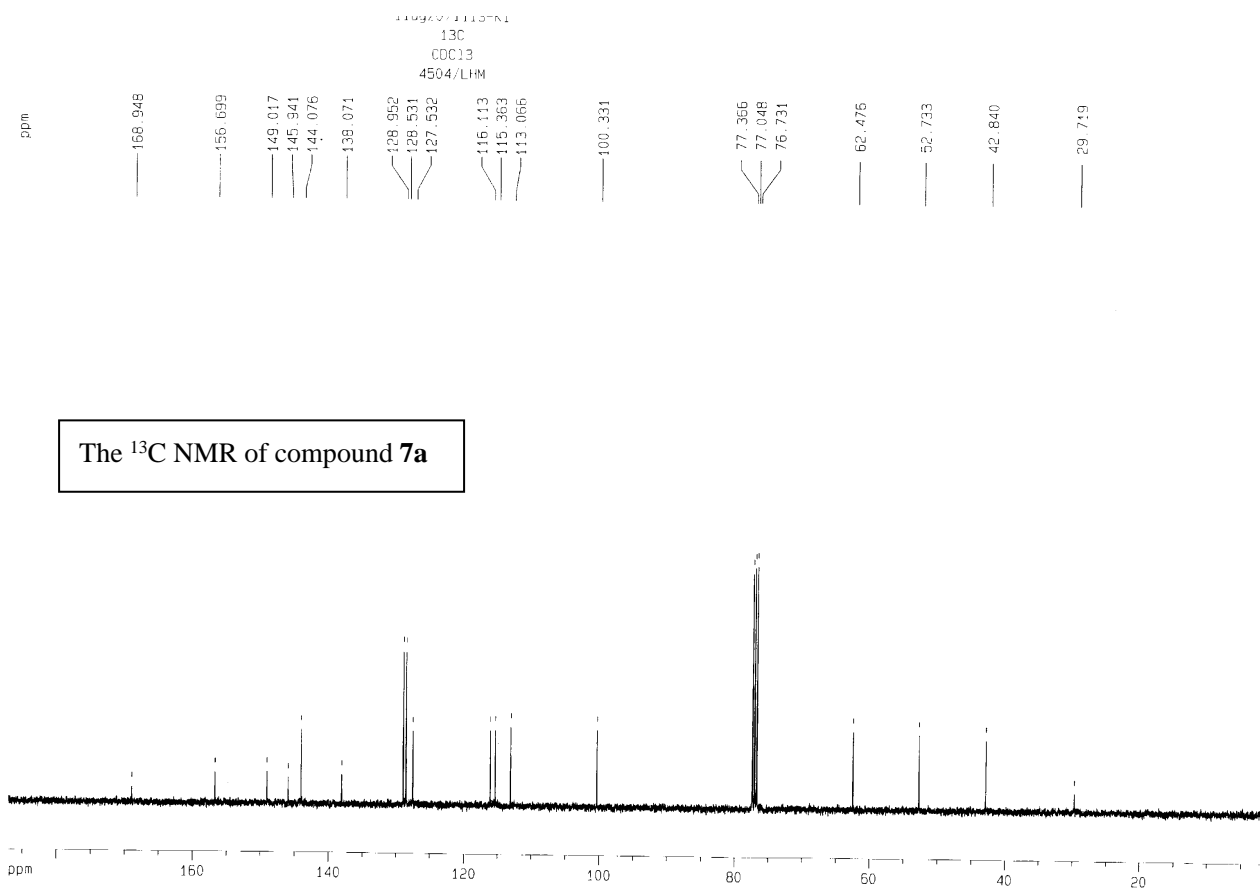

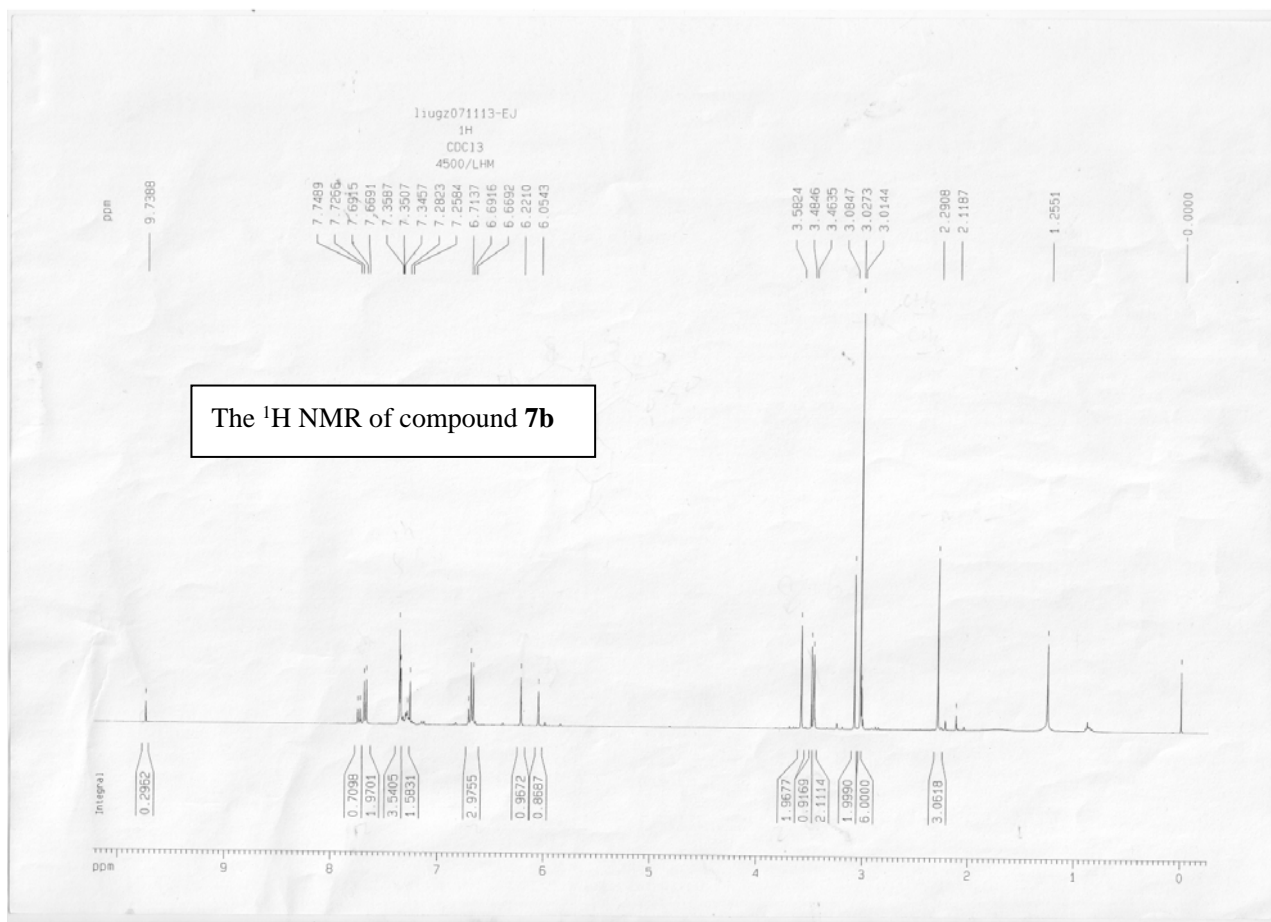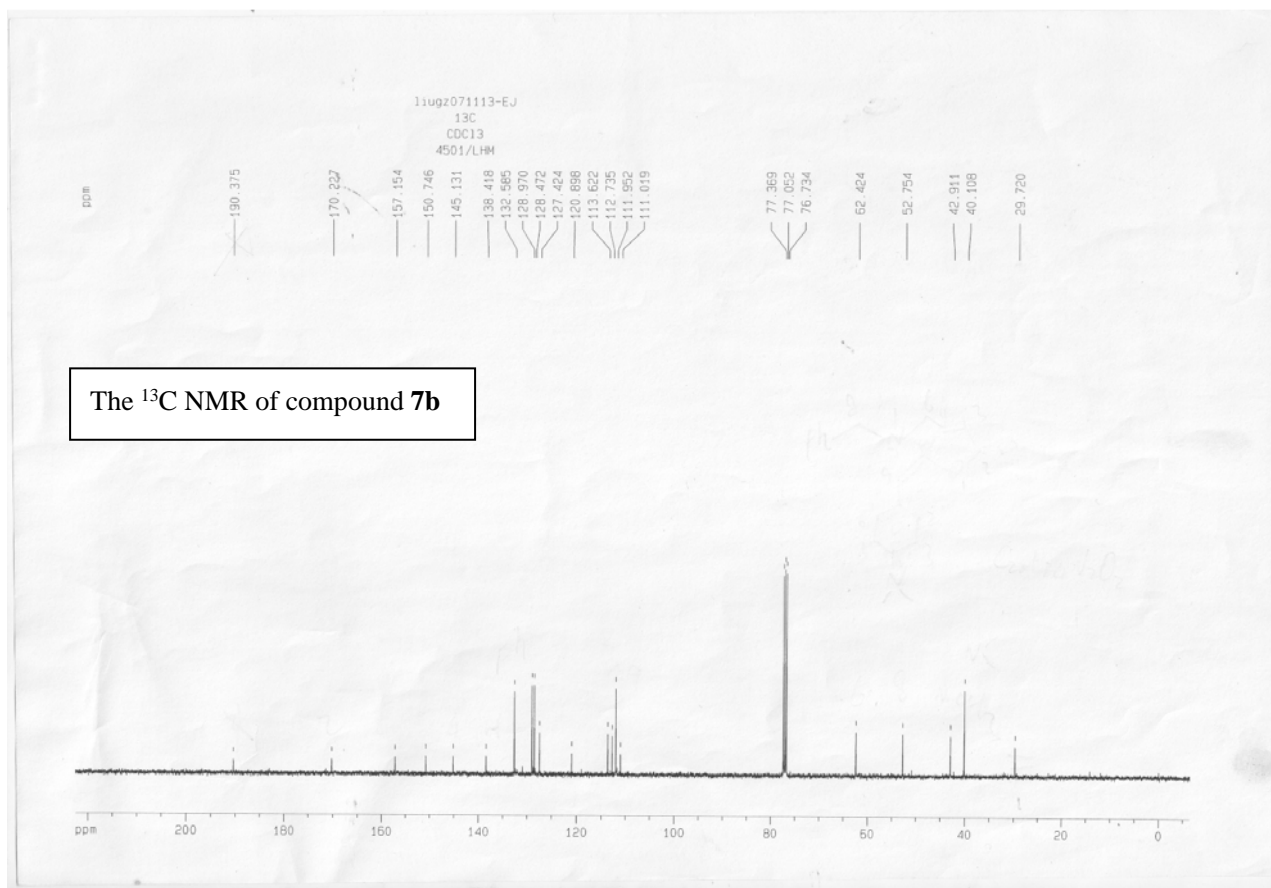

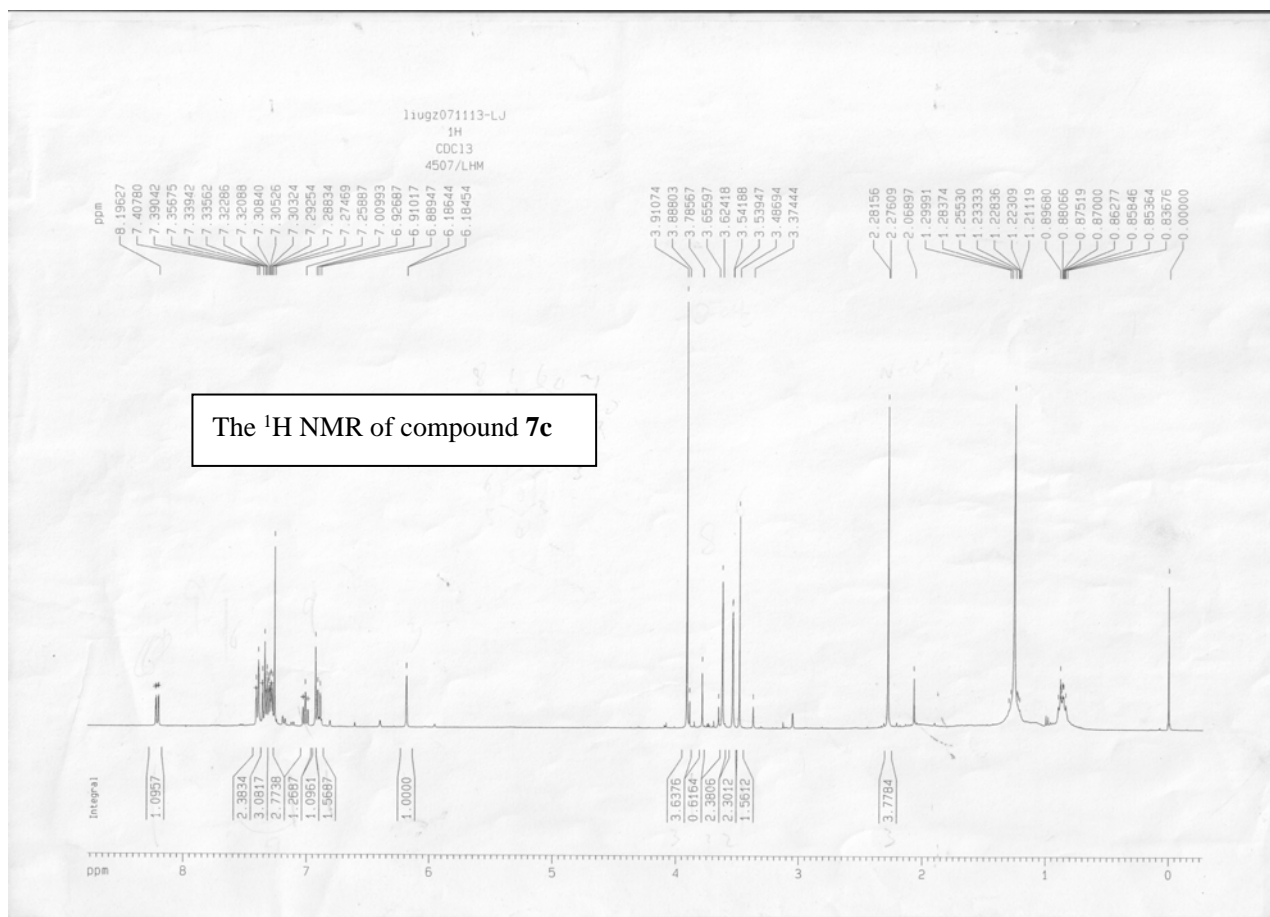

The  $^1\text{H}$  NMR of compound **7c**

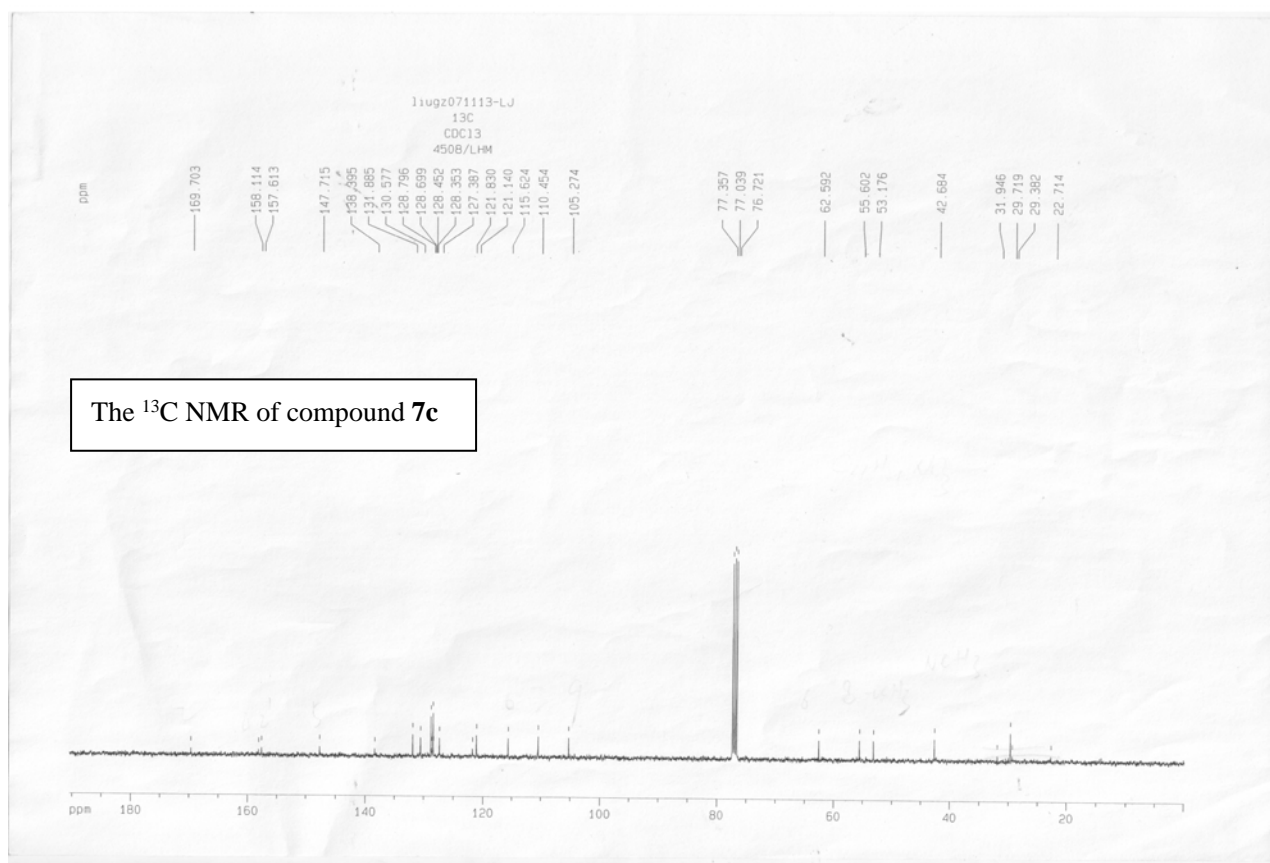

The  $^{13}\text{C}$  NMR of compound **7c**

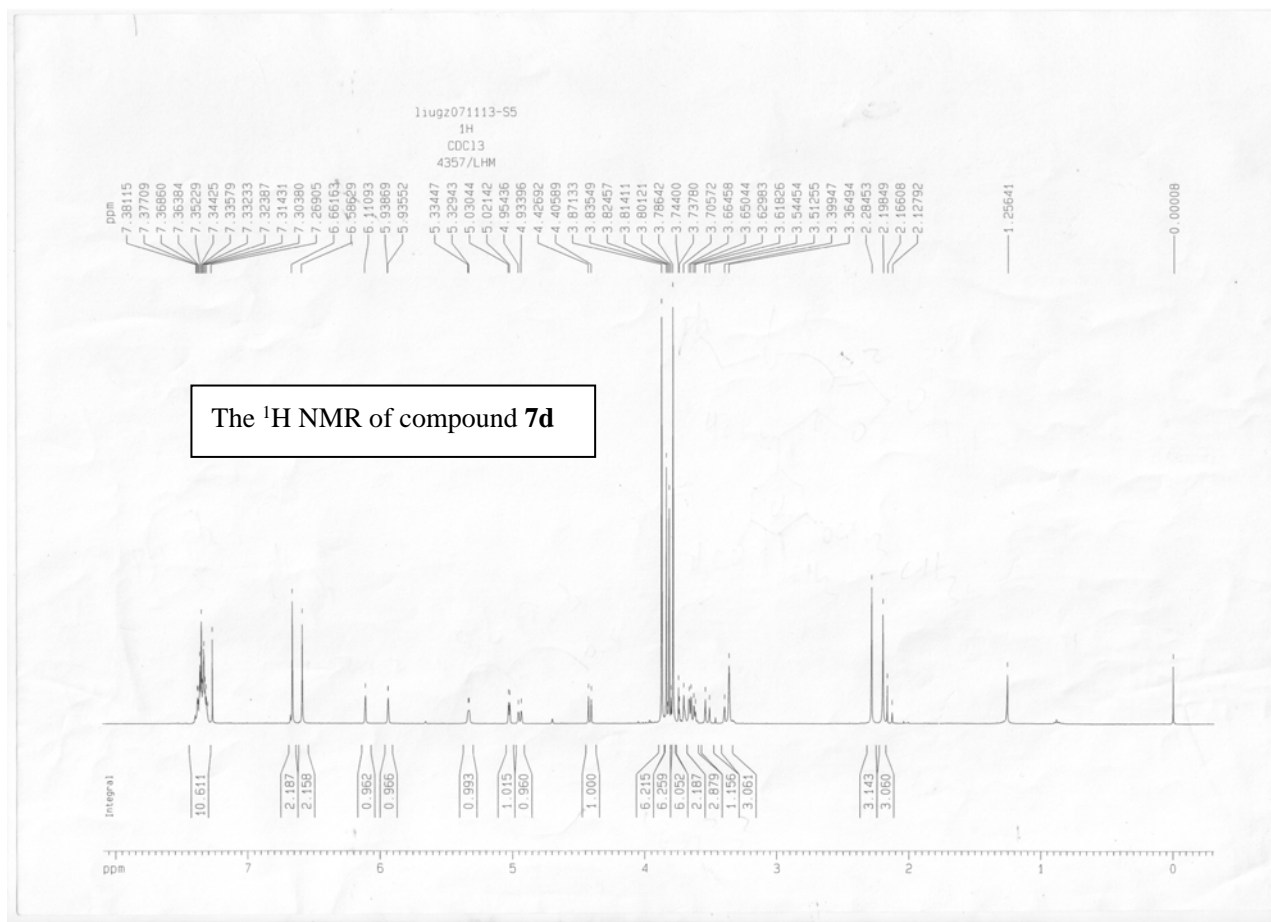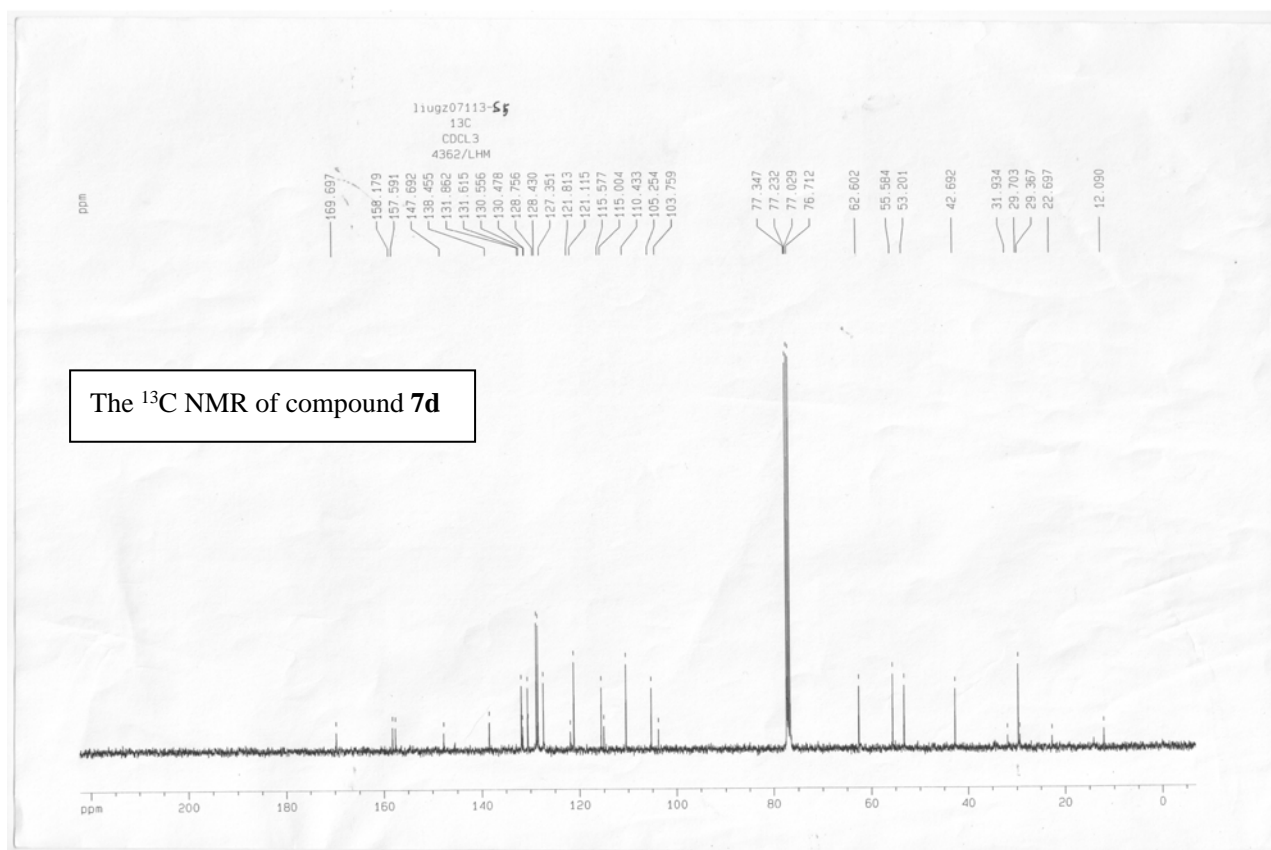

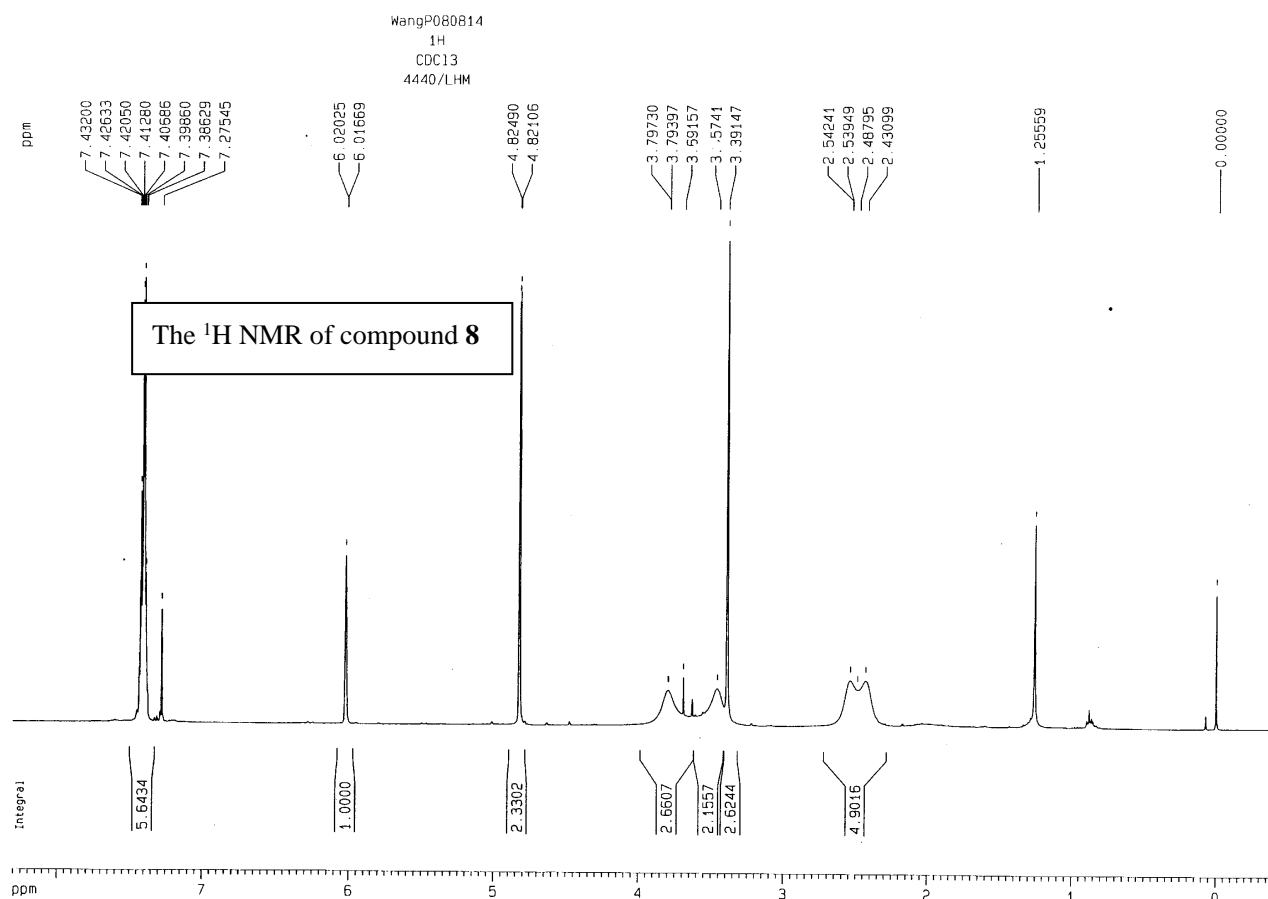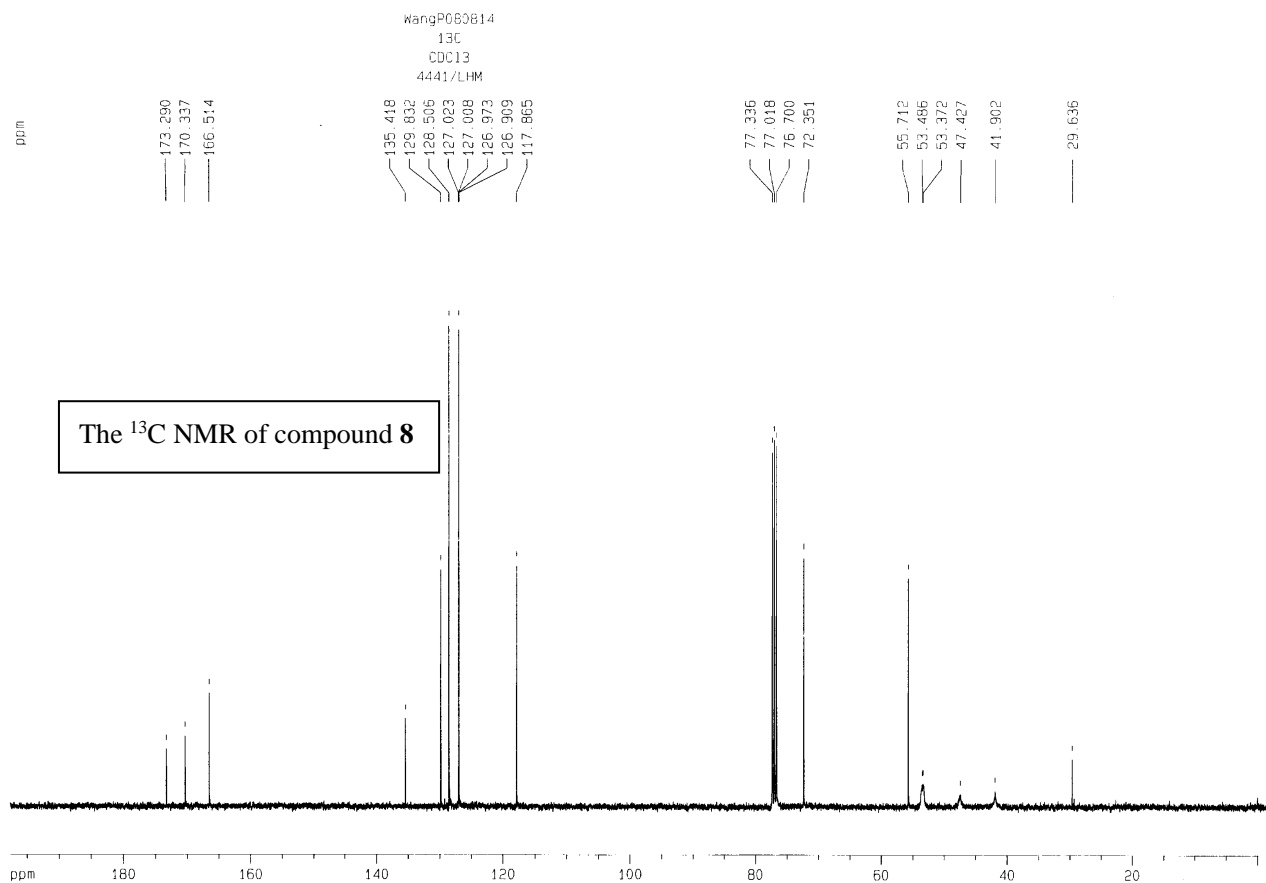

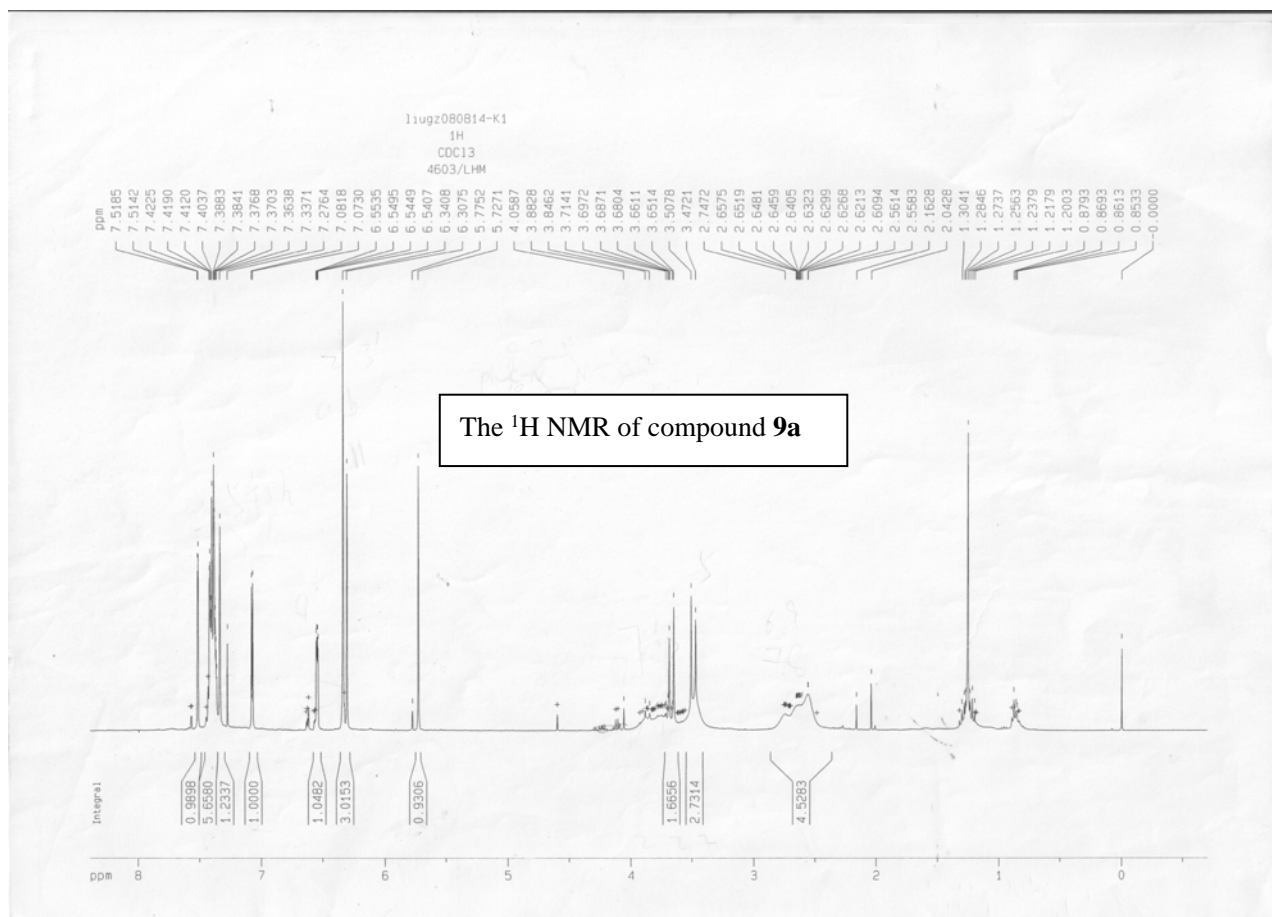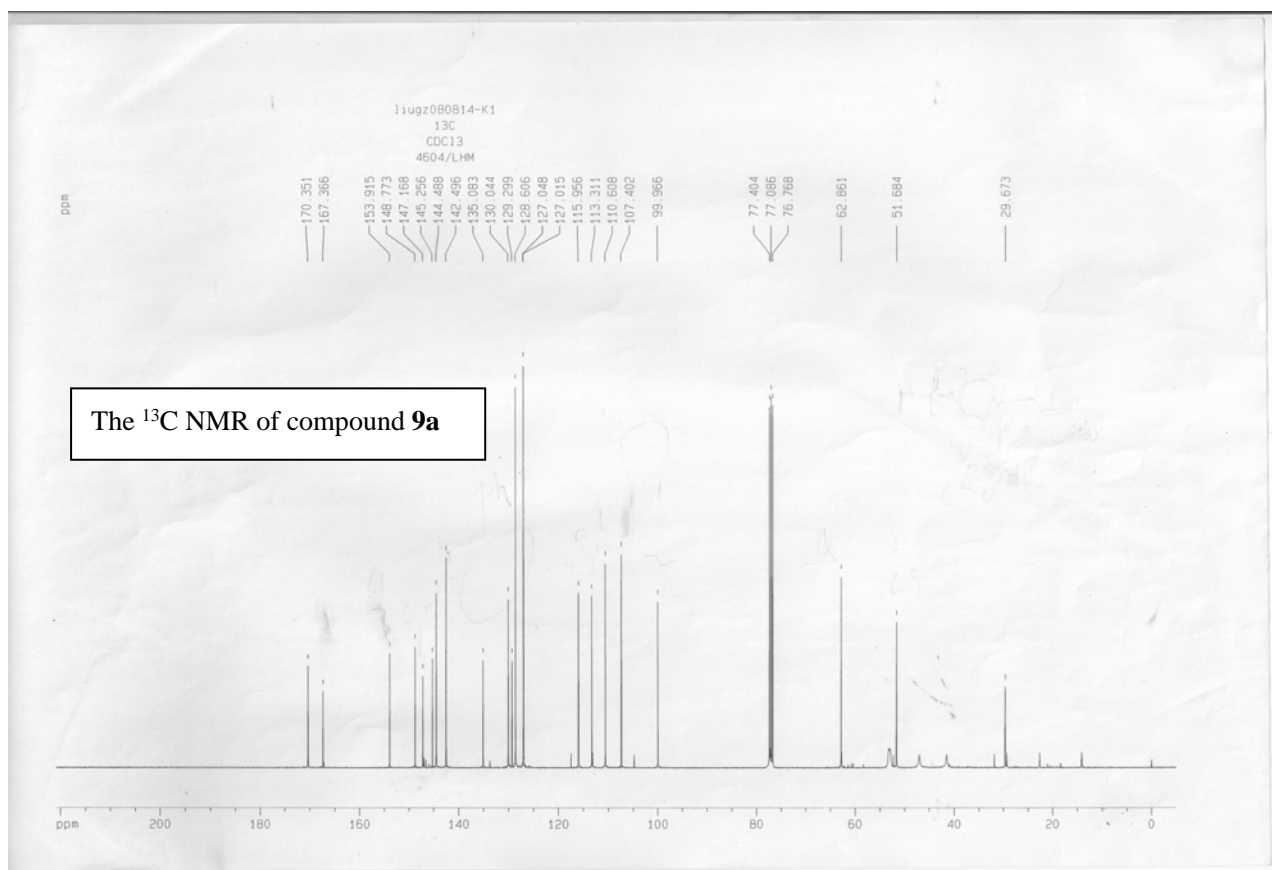

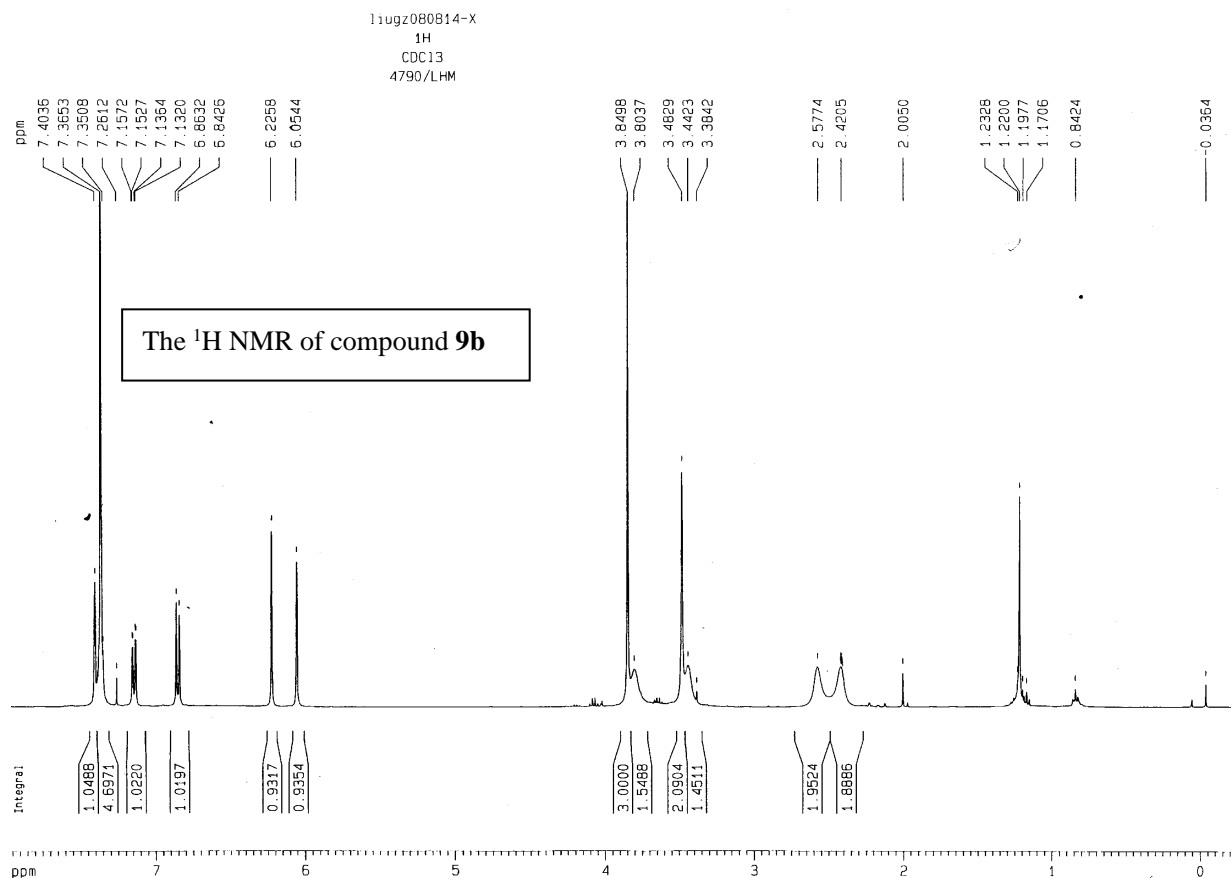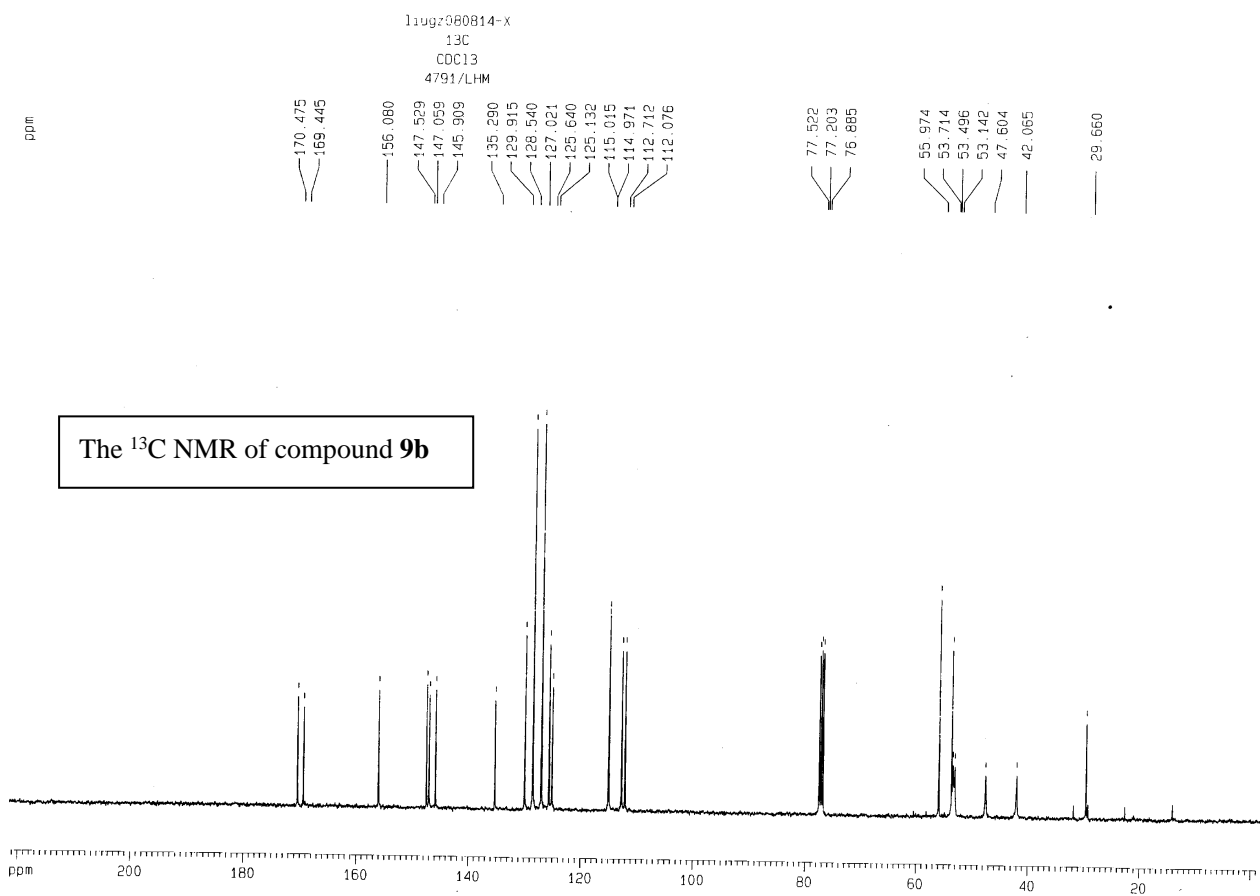

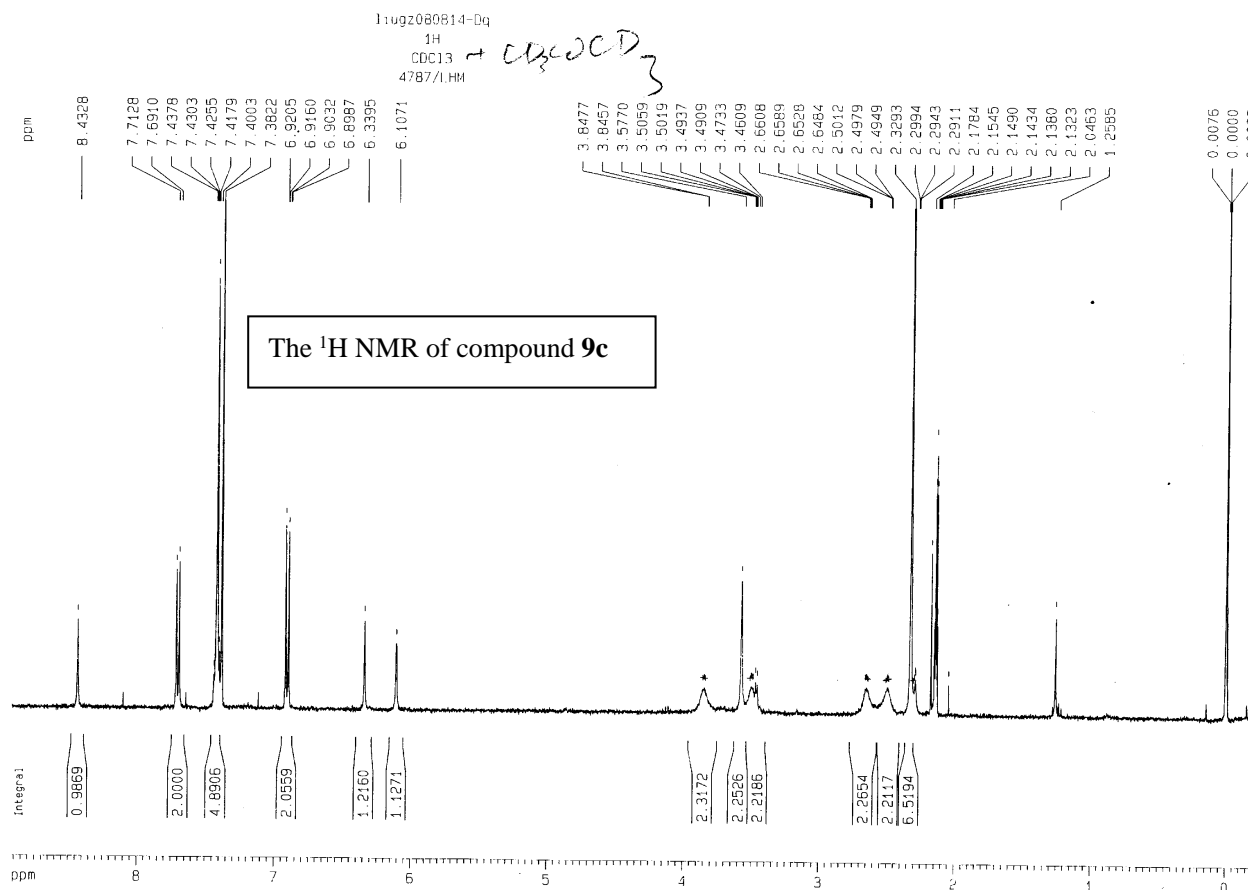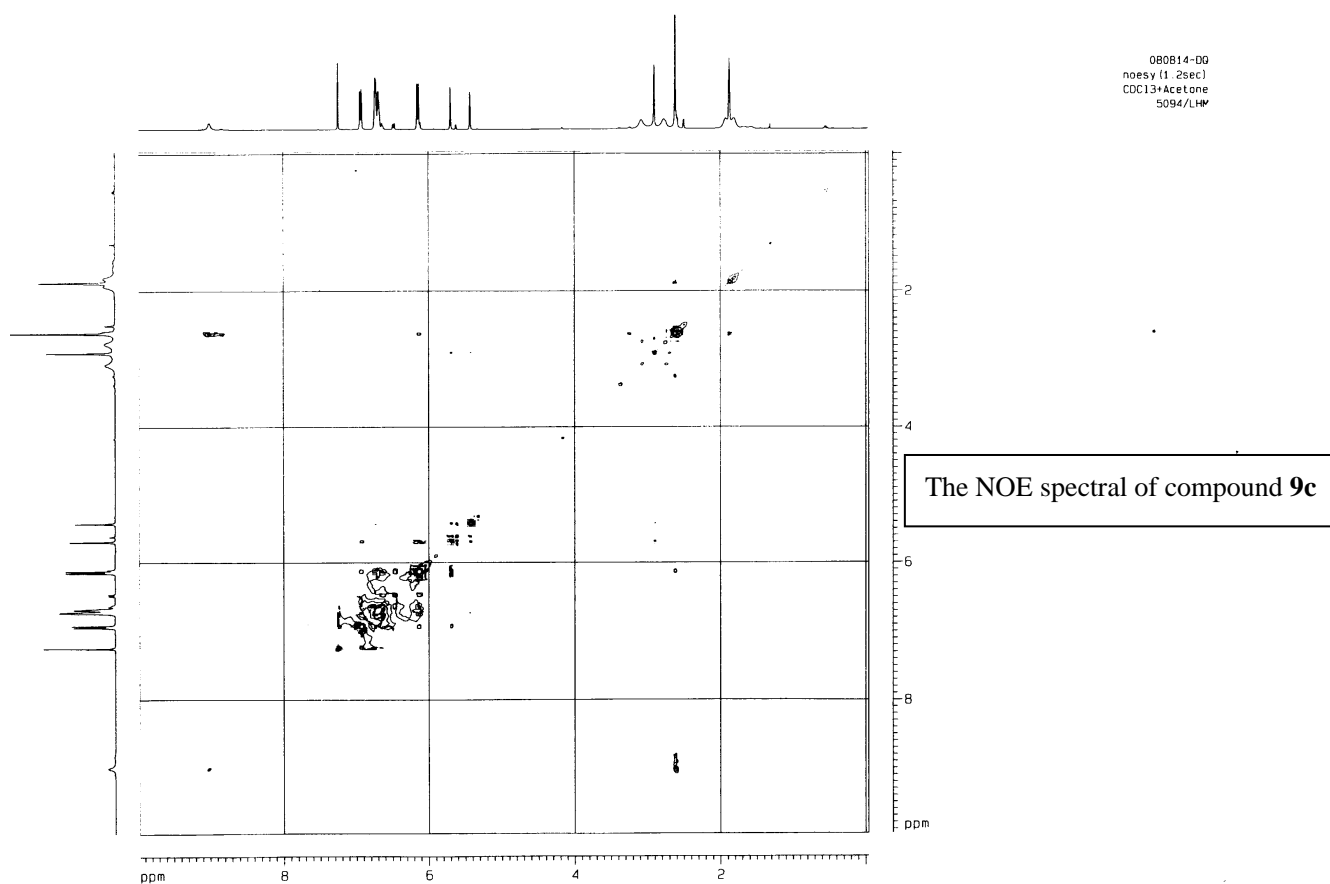



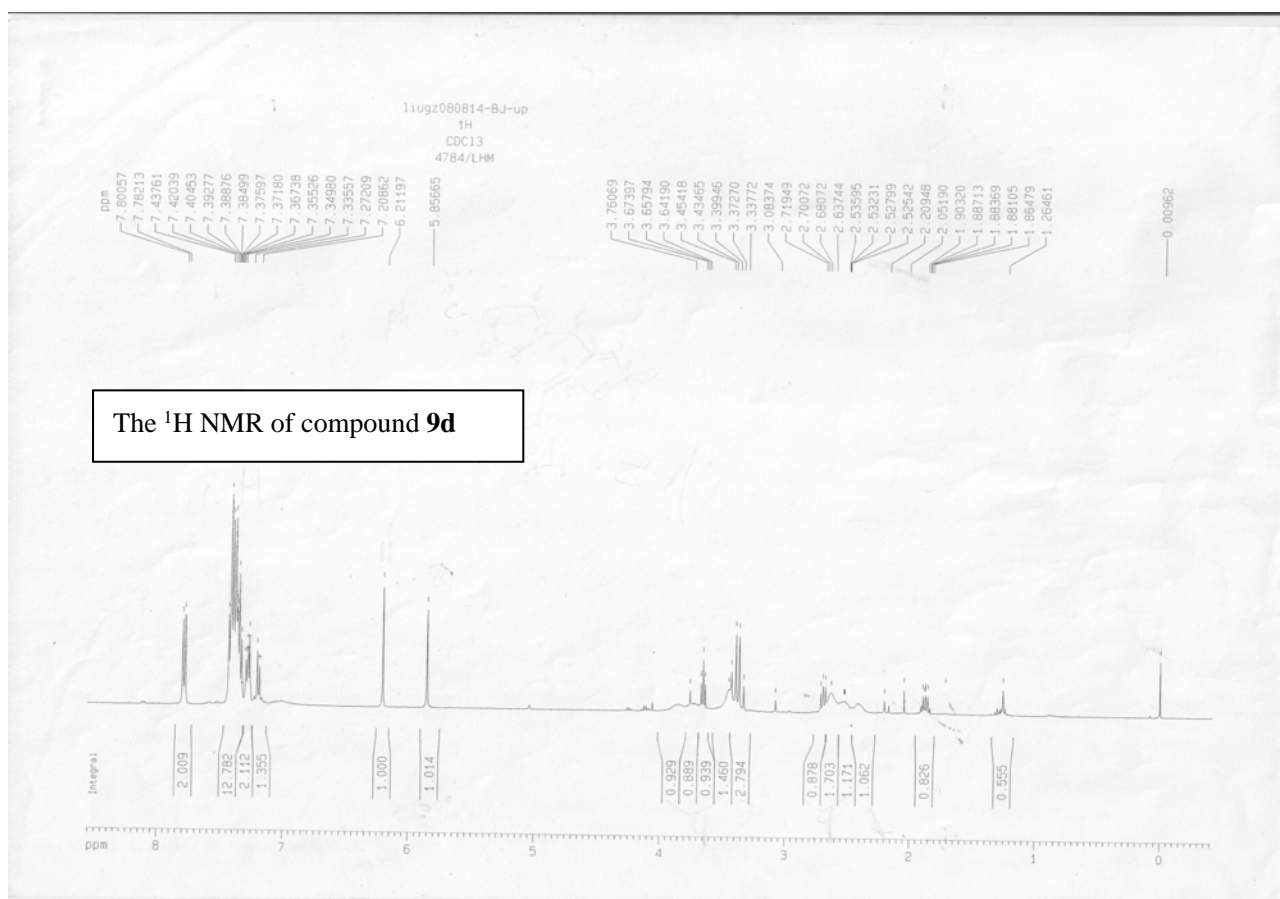

The  $^1\text{H}$  NMR of compound **9d**

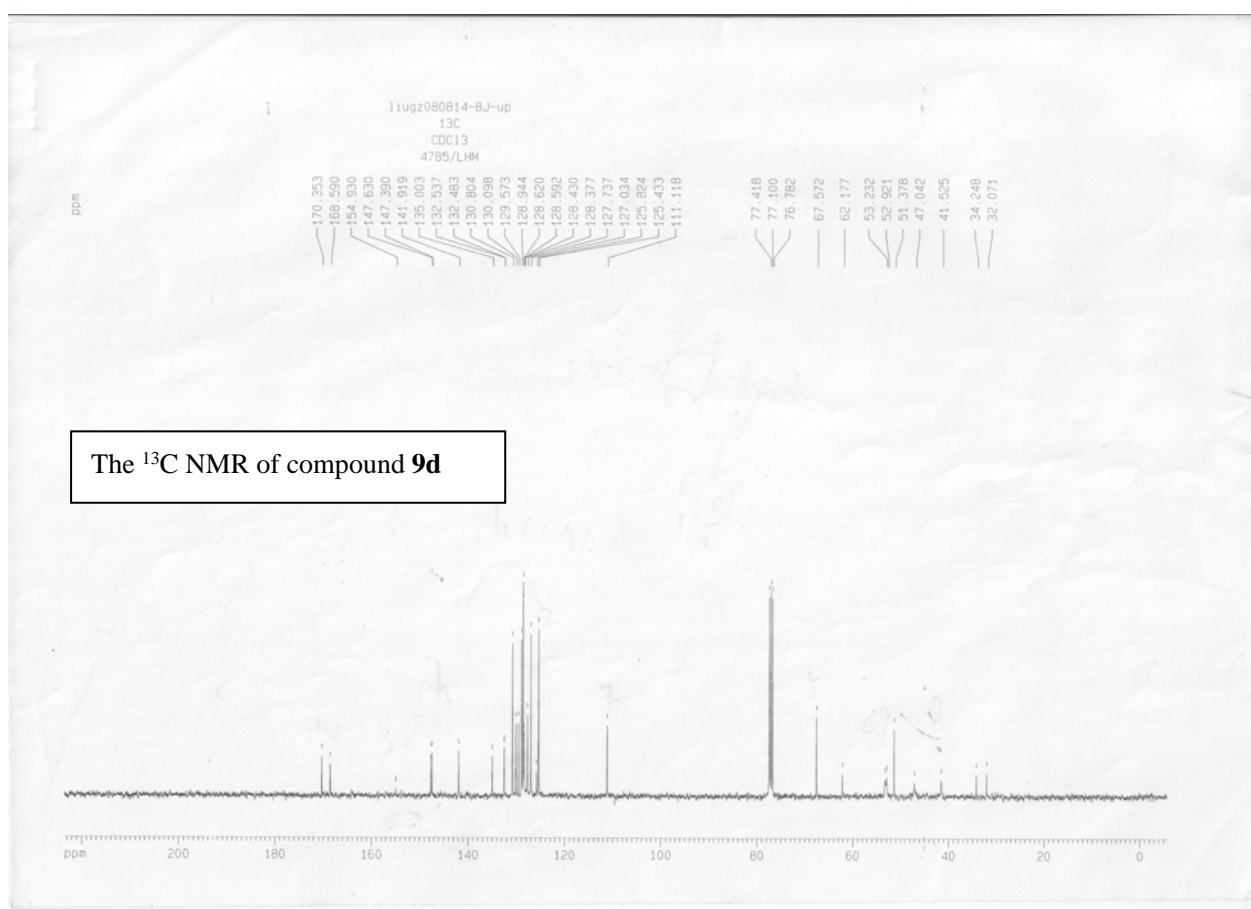

The  $^{13}\text{C}$  NMR of compound **9d**

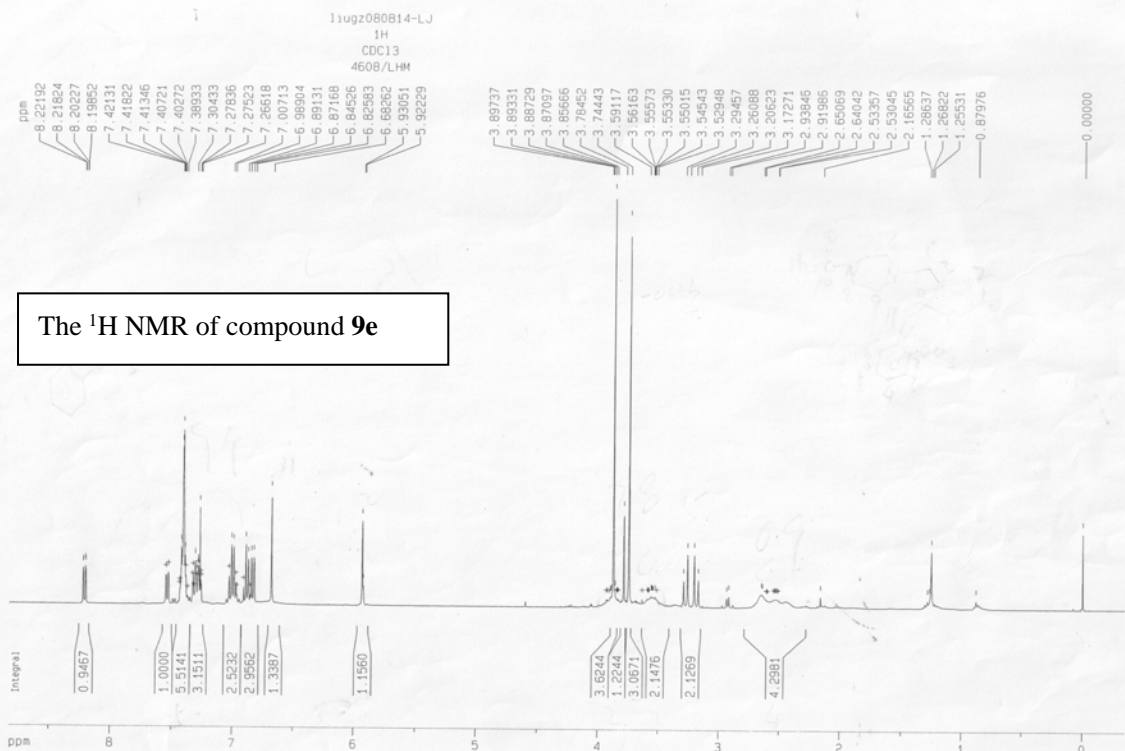

The  $^1\text{H}$  NMR of compound **9e**

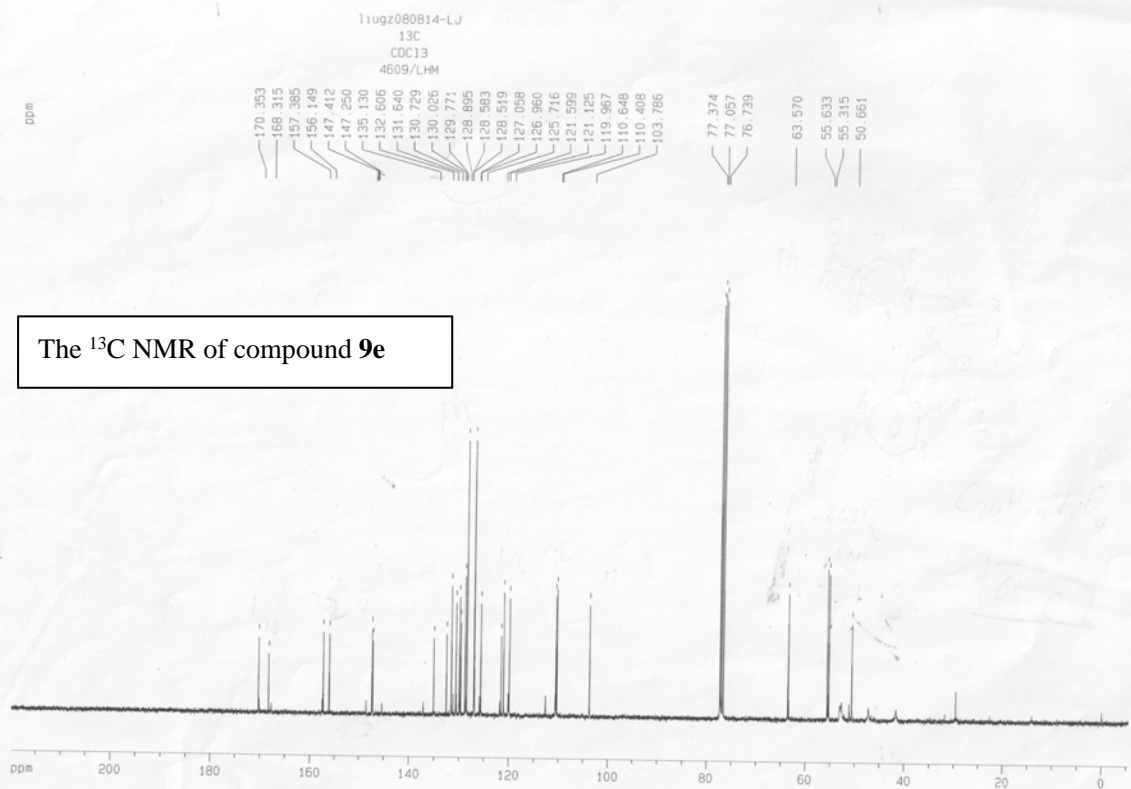

The  $^{13}\text{C}$  NMR of compound **9e**
